# Supplementary material for: Towards control of excitonic coupling in DNA-templated Cy5 aggregates: the principal role of chemical substituent hydrophobicity and steric interactions
Source: PubMed Central journal article supplement — Nanoscale. 2023 Jan 27;15(7):3284–99. doi: 10.1039/d2nr05544a (PMC9932853; doi:10.1039/d2nr05544a), 2023-01-27
Supplement: NR-015-D2NR05544A-s001.pdf [file NR-015-D2NR05544A-s001.pdf]

## Supporting information: Towards Control of Excitonic Coupling in DNA-Templated Cy5 Aggregates: The Principal Role of Chemical Substituent Hydrophobicity and Steric Interactions.

Authors: Sebastián A. Díaz\*, Gissela Pascual, Lance K. Patten, Simon K. Roy, Adam Meares, Matthew Chiriboga, Kimihiro Susumu, William B. Knowlton, Paul D. Cunningham, Divita Mathur, Bernard Yurke, Igor L Medintz, Jeunghoon Lee\*, Joseph S Melinger\*

E-mail corresponding authors: [sebastian.diaz@nrl.navy.mil](mailto:sebastian.diaz@nrl.navy.mil), [jeunghoonlee@boisestate.edu](mailto:jeunghoonlee@boisestate.edu), [joseph.melinger@nrl.navy.mil](mailto:joseph.melinger@nrl.navy.mil)

### Supporting Information Table of Contents

|                                                       | Page    |
|-------------------------------------------------------|---------|
| Oligonucleotide Sequences                             | S2      |
| Schematic of Cy5-R Integration into DNA               | S2      |
| Additional Spectra and Characterization               |         |
| Monomer Spectra                                       | S3      |
| Dimer Spectra                                         | S3      |
| PAGE gel                                              | S4      |
| Spectra as a function of MgCl <sub>2</sub>            | S4-S6   |
| HJ Melting Curves                                     | S7      |
| KRM parameters as a function of Log(P) and $\sigma_p$ | S8      |
| Logistic Fitting Parameters                           | S8      |
| Supporting Analysis of KRM Results                    |         |
| Parameter list                                        | S9      |
| Additional Discussion                                 | S10-S11 |
| Complete Cy5Cl data                                   | S12-S19 |
| Complete Cy5Peg data                                  | S20-S27 |
| Complete Cy5hex data                                  | S28-S35 |
| Complete Cy5tBu data                                  | S36-S41 |
| Complete Cy5H data                                    | S42-S47 |

**Table S1:** Oligonucleotide sequences

| Name | Sequence (5'-3') | Name | Sequence (5'-3') |
|------|------------------|------|------------------|
|------|------------------|------|------------------|

|             |                            |           |                               |
|-------------|----------------------------|-----------|-------------------------------|
| Unlabeled A | ATATAATCGCTCGCATATTATGACTG | Labeled A | ATATAATCGCTCG-X-CATATTATGACTG |
| Unlabeled B | CAGTCATAATATGTGGAATGTGAGTG | Labeled B | CAGTCATAATATG-X-TGGAATGTGAGTG |
| Unlabeled C | CACTCACATTCCACTCAACACCACAA | Labeled C | CACTCACATTCCA-X-CTCAACACCACAA |
| Unlabeled d | TTGTGGTGTGAGCGAGCGATTATAT  | Labeled D | TTGTGGTGTGAG-X-CGAGCGATTATAT  |

X indicates the position of Cy5-R

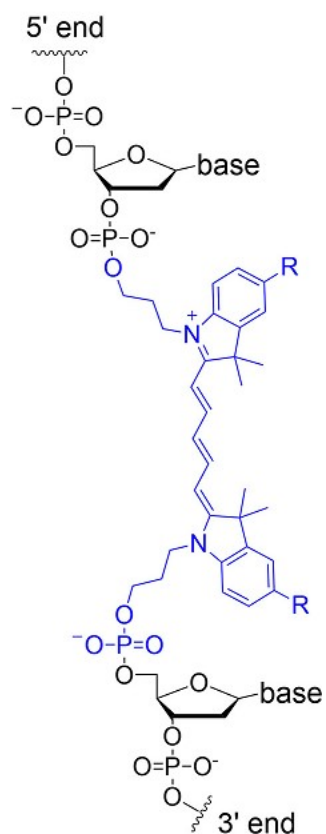

**Figure S1.** General structure of the Cy5 dye derivatives inserted internally into DNA oligonucleotides during phosphoramidite synthesis and attached to the DNA at both the 3' and 5' ends.

## Additional Spectra and Characterization

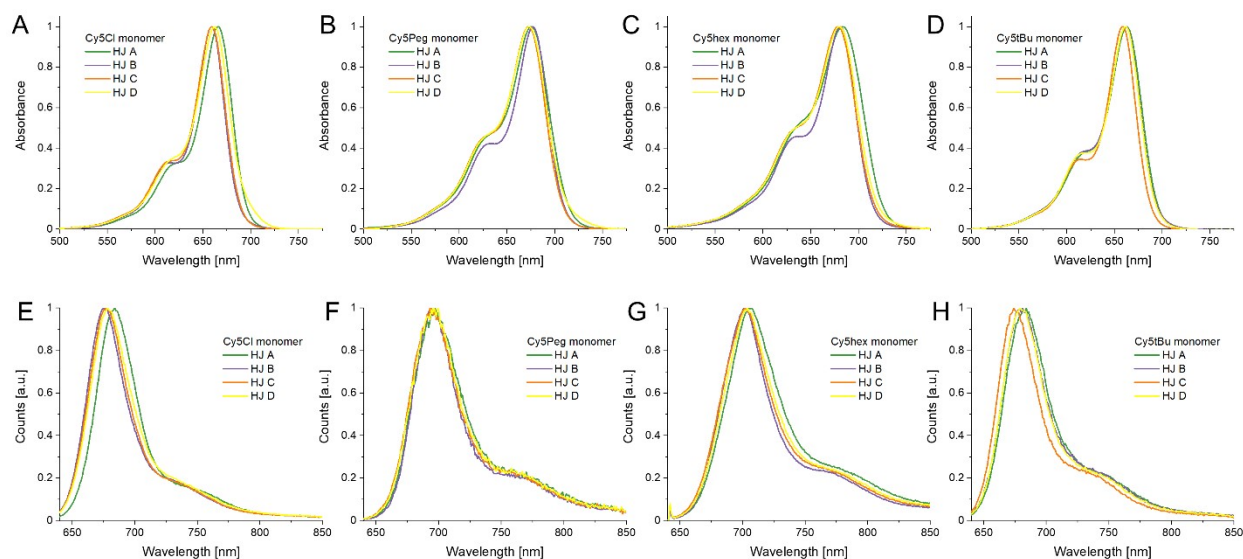

**Figure S2:** (A-D) Absorbance of Cy5-R monomers. (E-H) Fluorescence emission of Cy5-R monomers. 615 nm excitation wavelength.

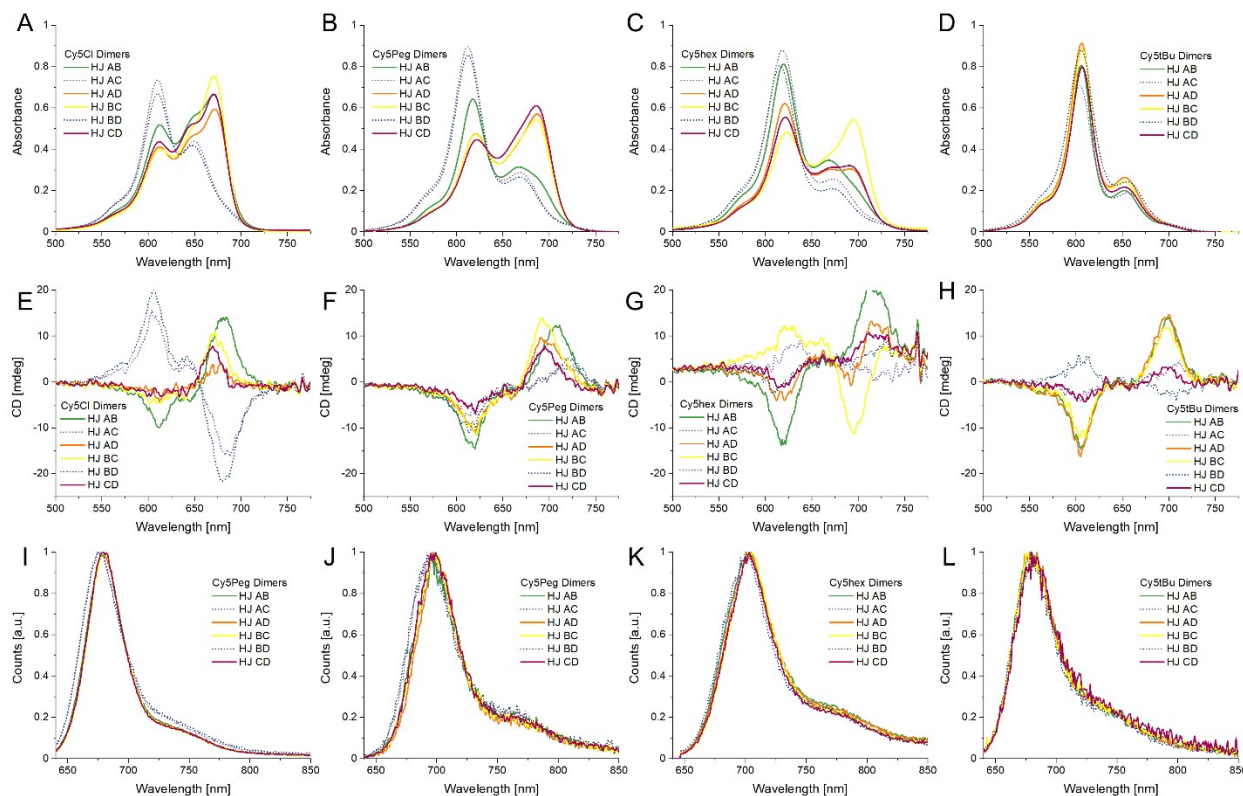

**Figure S3:** Adjacent dimers are full lines while transverse dimers are dotted lines. (A-D) Absorbance of Cy5-R dimers. (E-H) CD spectra of Cy5-R dimers. (I-L) Fluorescence emission of Cy5-R. 615 nm excitation wavelength.

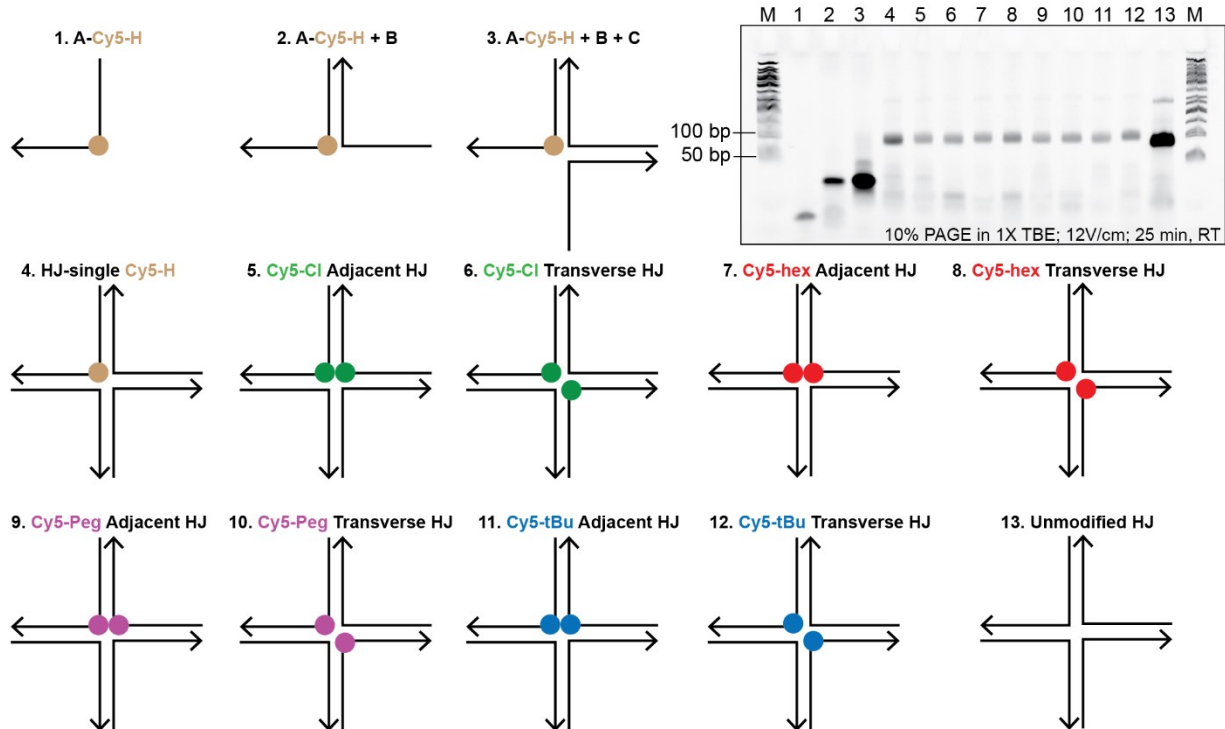

**Figure S4:** 10% Polyacrylamide gel electrophoresis of variations of the HJ Cy5-R homodimers in 1× TAE and 15 mM Mg<sup>2+</sup> as the sample buffer as well as control structures that include partial structures and unlabeled HJ. It can be seen that all structures form with relatively high efficiency. Quantification on the gels was >85% HJ efficiency.

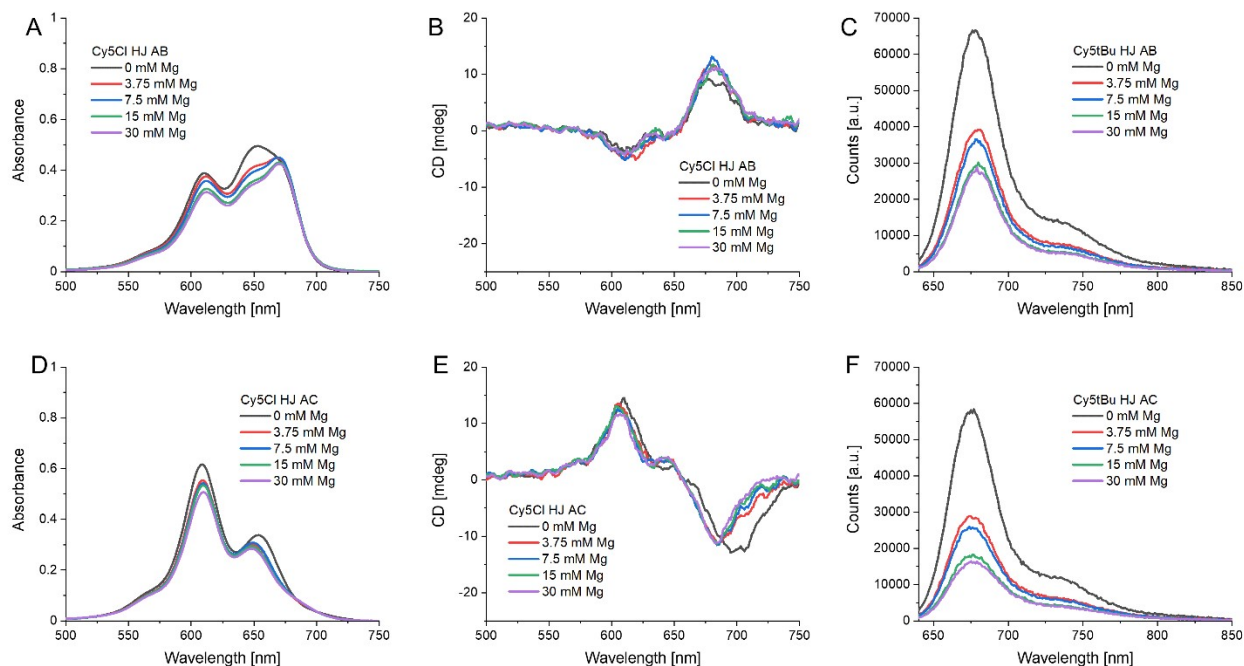

**Figure S5:** Spectra of Cy5Cl in 1× TAE with increasing concentration of Mg<sup>2+</sup>. (A-C) Absorbance, CD, and fluorescence emission (615 nm excitation) of HJ AB dimer. (D-F) Absorbance, CD, and fluorescence emission (615 nm excitation) of HJ AC dimer.

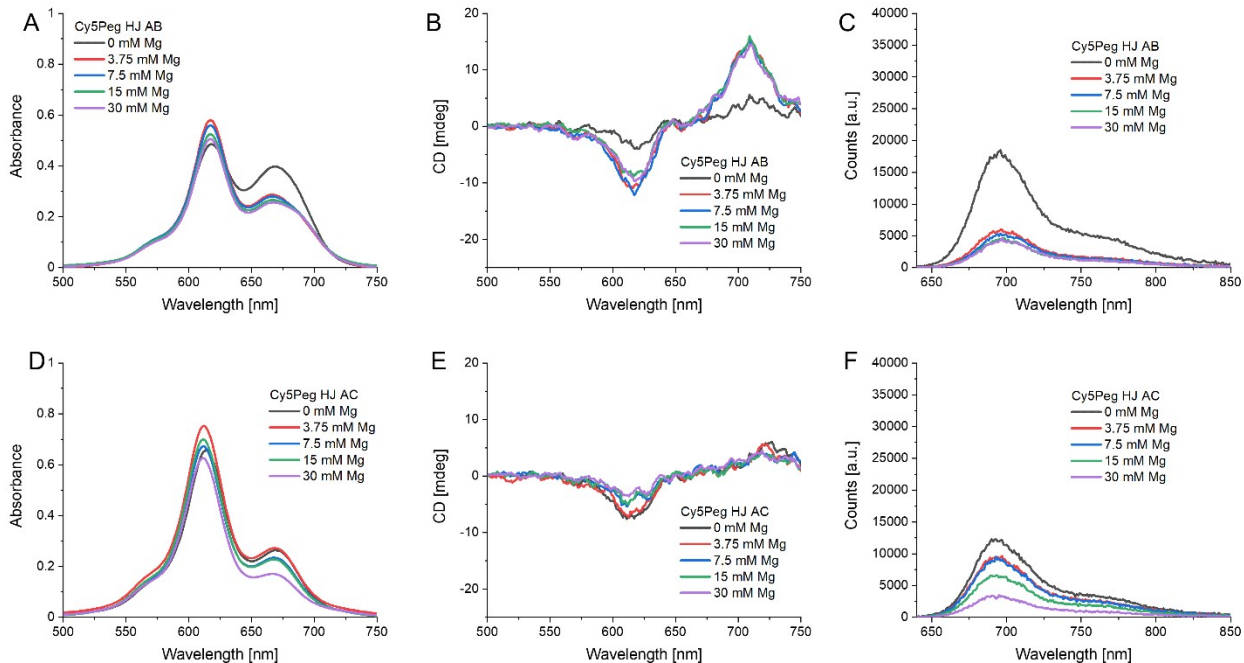

**Figure S6:** Spectra of Cy5Peg in  $1\times$  TAE with increasing concentration of  $Mg^{+2}$ . (A-C) Absorbance, CD, and fluorescence emission (615 nm excitation) of HJ AB dimer. (D-F) Absorbance, CD, and fluorescence emission (615 nm excitation) of HJ AC dimer.

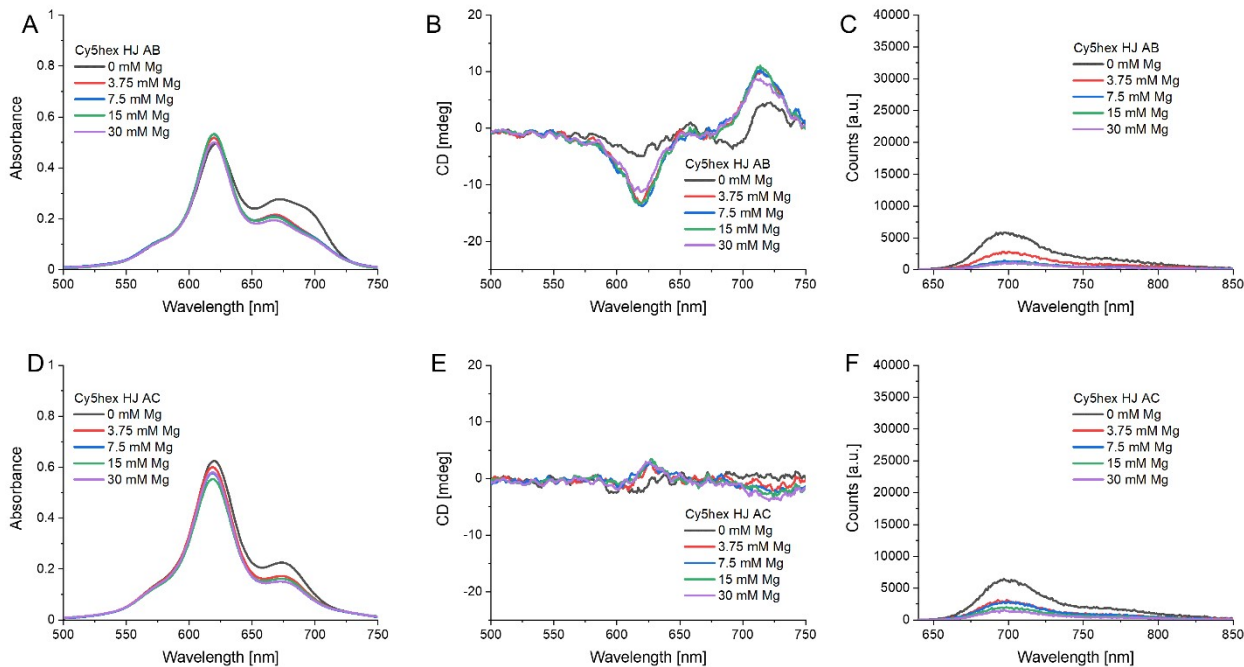

**Figure S7:** Spectra of Cy5hex in  $1\times$  TAE with increasing concentration of  $Mg^{+2}$ . (A-C) Absorbance, CD, and fluorescence emission (615 nm excitation) of HJ AB dimer. (D-F) Absorbance, CD, and fluorescence emission (615 nm excitation) of HJ AC dimer.

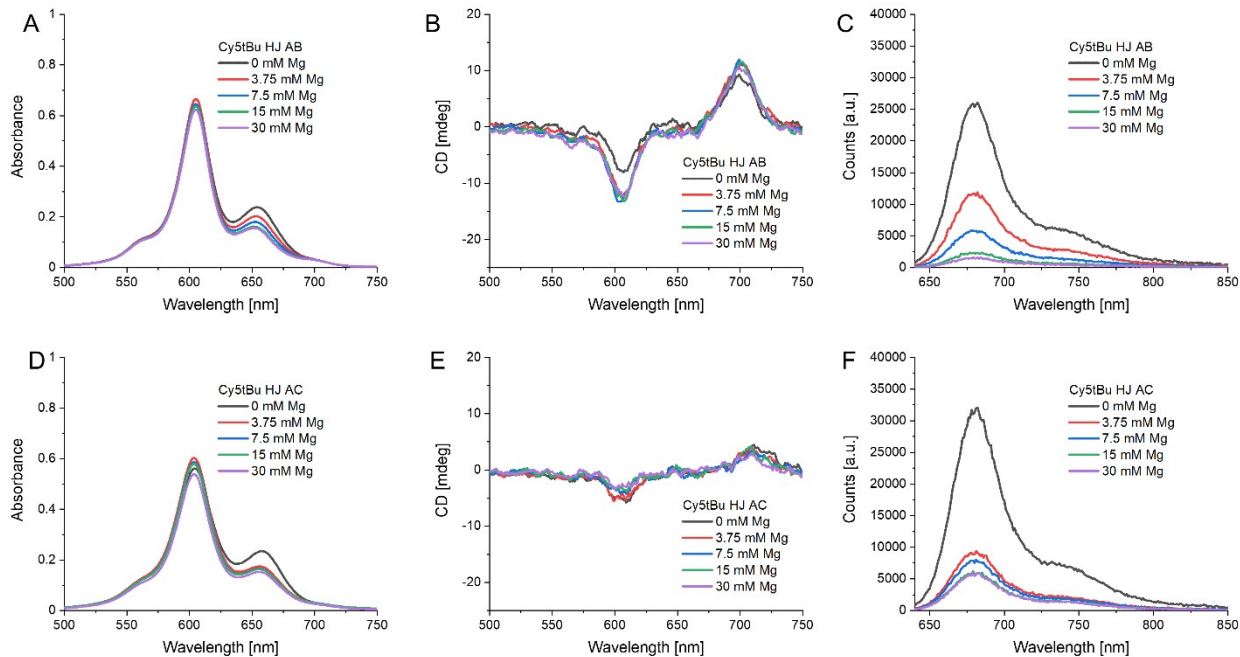

**Figure S8:** Spectra of Cy5tBu in 1× TAE with increasing concentration of  $Mg^{+2}$ . (A-C) Absorbance, CD, and fluorescence emission (615 nm excitation) of HJ AB dimer. (D-F) Absorbance, CD, and fluorescence emission (615 nm excitation) of HJ AC dimer.



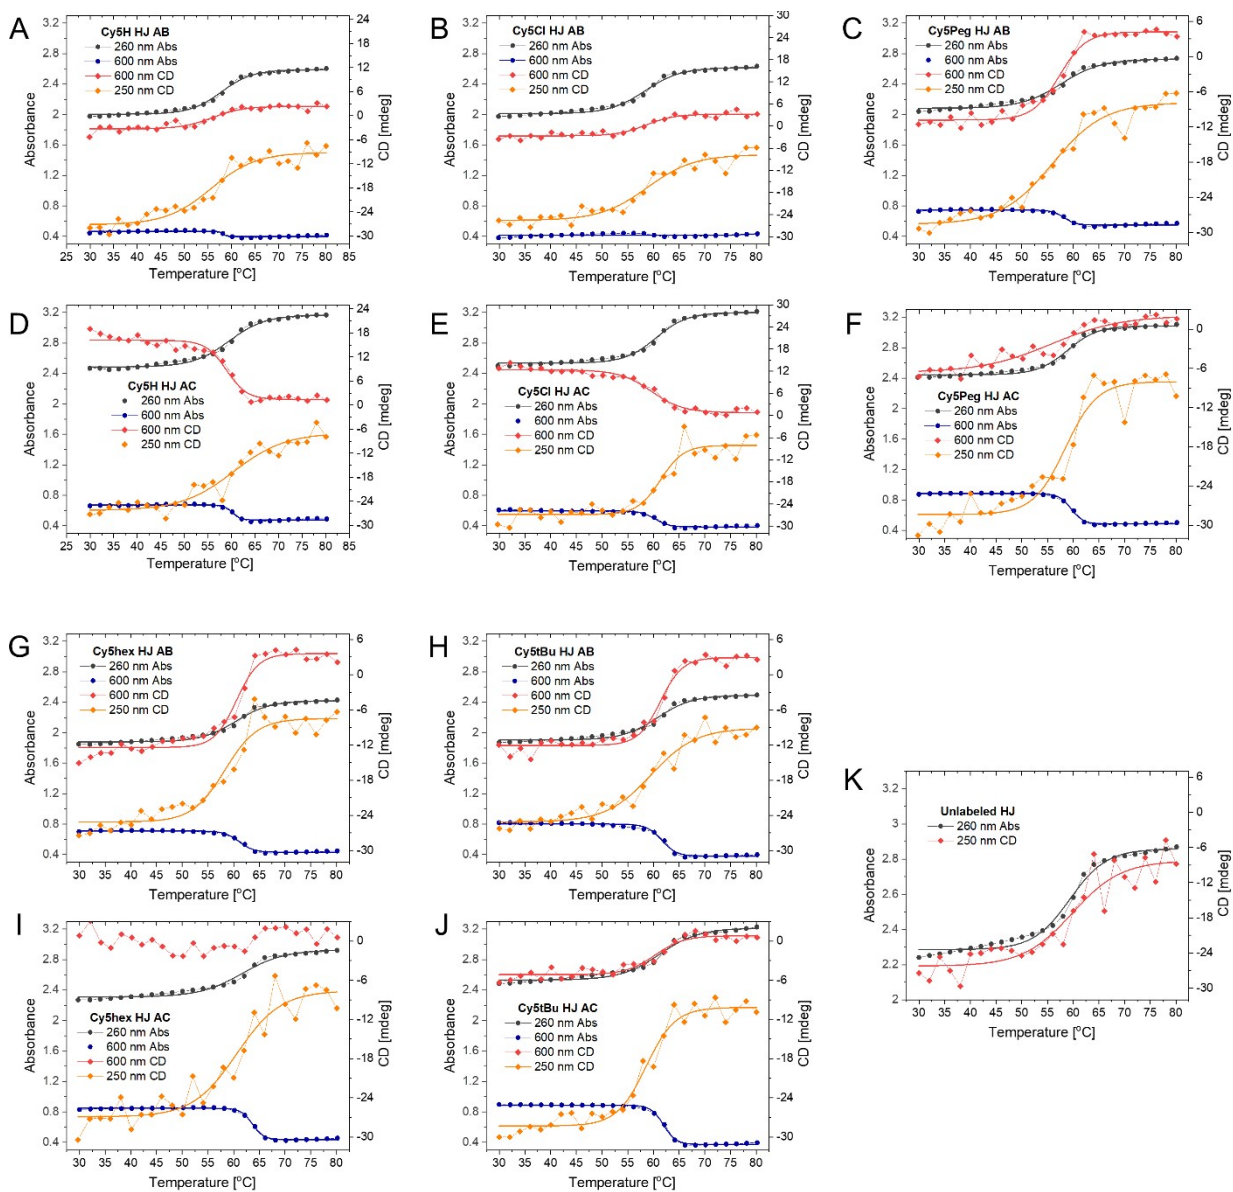

**Figure S9:** Melting curves of Cy5-R HJ in  $1\times$  TAE with  $15\text{ mM Mg}^{+2}$  following both absorbance (260 nm, black ; 600 nm, blue) and CD (250 nm, orange ; 600 nm, red) signals. (A, D) Cy5H HJ AB and AC, respectively. (B, E) Cy5Cl HJ AB and AC, respectively. (C, F) Cy5Peg HJ AB and AC, respectively. (G, I) Cy5hex HJ AB and AC, respectively. The 600 nm CD signal for Cy5hex HJ AC was not fit as the signal change was not clear. (H, J) Cy5tBu HJ AB and AC, respectively. (K) Unlabeled HJ.

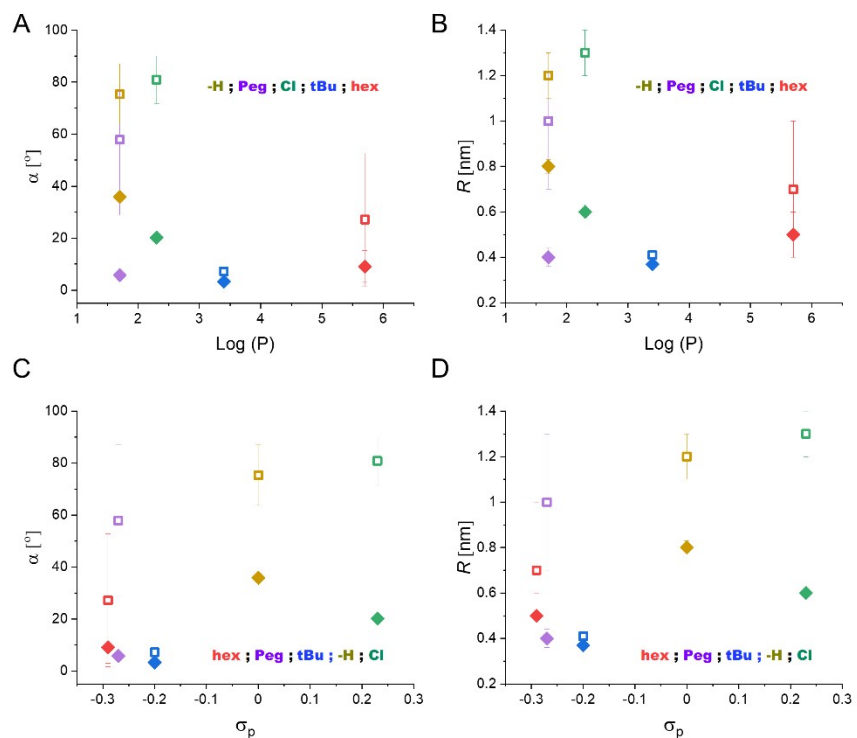

**Figure S10:** A)  $\alpha$  as a function of hydrophobicity. B)  $R$  as a function of hydrophobicity. C)  $\alpha$  as a function of the electron donating capability of the substituent. D)  $R$  as a function of electron donating capability of the substituent.

$$y = A_2 + \frac{(A_1 - A_2)}{1 + \left(\frac{x}{x_0}\right)^p}$$

**Table S2:** Fitting parameters of logistic fits from Figure 6C-E main text. Equation:

| Data                   | $A_1$           | $A_2$           | $X_0$           | $p$           | $R^2$ |
|------------------------|-----------------|-----------------|-----------------|---------------|-------|
| $J_{m,n}$ - Adjacent   | $51 \pm 20$     | $115 \pm 20$    | $0.91 \pm 0.04$ | $25 \pm 6$    | 0.90  |
| $J_{m,n}$ - Transverse | $69.7 \pm 1.2$  | $131 \pm 2$     | $0.59 \pm 0.03$ | $6.4 \pm 1.2$ | 0.99  |
| $\alpha$ - Adjacent    | $79 \pm 10$     | $7.2 \pm 1.6$   | $0.90 \pm 0.04$ | $31 \pm 8$    | 0.97  |
| $\alpha$ - Transverse  | $35.9 \pm 0.3$  | $3.1 \pm 0.3$   | $0.49 \pm 0.01$ | $4.0 \pm 0.2$ | 0.99  |
| $R$ - Adjacent         | $1.26 \pm 0.06$ | $0.41 \pm 0.02$ | $0.87 \pm 0.04$ | $9 \pm 2$     | 0.98  |
| $R$ - Transverse       | $0.80 \pm 0.03$ | $0.37 \pm 0.01$ | $0.51 \pm 0.03$ | $3.5 \pm 1.5$ | 0.99  |



## Supporting Analysis of KRM Results

Parameter List (See Figure 5 in the main text for schematics)

$E\nu$  - The energy of vibron ( $eV$ )

$d$  - Displacement of excited state vibronic potential (dimensionless units)

$\Gamma$  - Energy loss damping constant ( $eV$ )

$J_0$  - Characteristic exchange energy ( $meV\text{-}nm^3$ )

$M$  - Dipole Moment (*Debye*)

$nv$  - Vibrational state Hilbert space

$E_{of}$  - Energy offset from monomer ( $eV$ )

$l$  - Length of the transition dipole moment ( $nm$ )

$cdis$  - Closest distance between the long axes of any pair of dyes ( $nm$ )

$r$  - The ratio of theoretical to experimental values of the ratio of the max abs CD peak height to max absorbance peak height

$OI_{AB}$  - Normalized overlap integral for the experimental and theoretical absorbance curves

$OI_{CD}$  - Normalized overlap integral for the experimental and theoretical CD spectra

$OI_{Tot}$  - Mean of  $OI_{AB}$  and  $OI_{CD}$

$MSD_{abs}$  - Absorbance spectrum mean-square deviation

$MSD_{cd}$  - CD spectrum mean-square deviation

$w_{abscd}rms$  - Weighted mean-squared deviation between the experimental and theoretical ABS and CD spectra

$J_{m,n}$  - The excitonic hopping parameter ( $meV$ )

$R$  - Center-to-Center distance ( $\text{\AA}$ )

$dmin$  - The shortest distance between the transition dipole moment vectors ( $nm$ )

$\alpha$  - Oblique angle ( $^\circ$ )

$\theta_{1s}$  - Slip angle, the angle between dye 1 and the line connecting dye centers ( $^\circ$ )

$\theta_{2s}$  - Slip angle, the angle between dye 2 and the line connecting dye centers ( $^\circ$ )

$\theta_t$  - Twist angle, the angle between dye 1 and dye 2 in the XY plane (rotation about Z-axis or R) ( $^\circ$ )

As detailed in the main text there were a few cases where the KRM fitting was improved by assuming that the spectra were composed of a mixed population of Cy5-R dimers. We note that the fitting program necessarily assumed 50% population for each dimer, though of course there is no experimental evidence to support this specific distribution. The particular case of Cy5hex HJ BC is shown in Figure S9, while a compilation of the specific cases is provided in Table S2. All other systems not found in Table S2 were the best fit by a single dimer.

### Cy5hex HJ BC – Single dimer

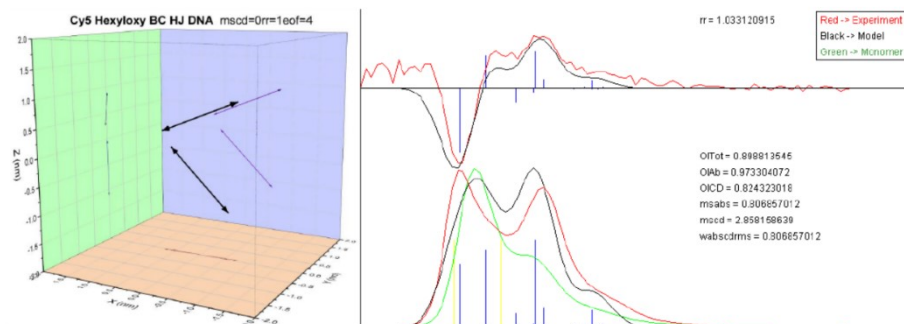

### Cy5hex HJ BC – two dimers : 1 H-like + 1 J-like

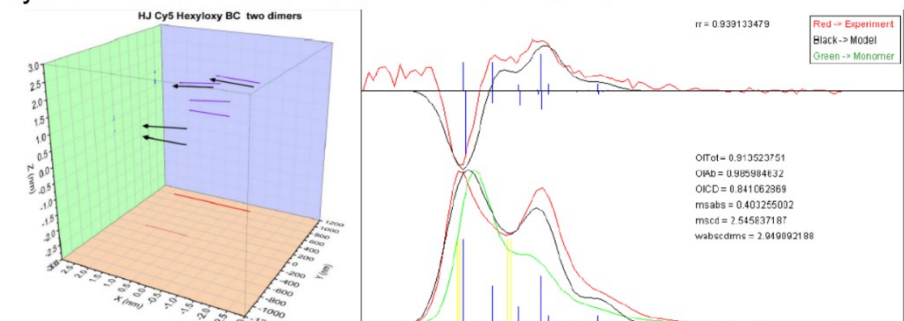

### Cy5hex HJ BC – two dimers : 2 oblique dimers

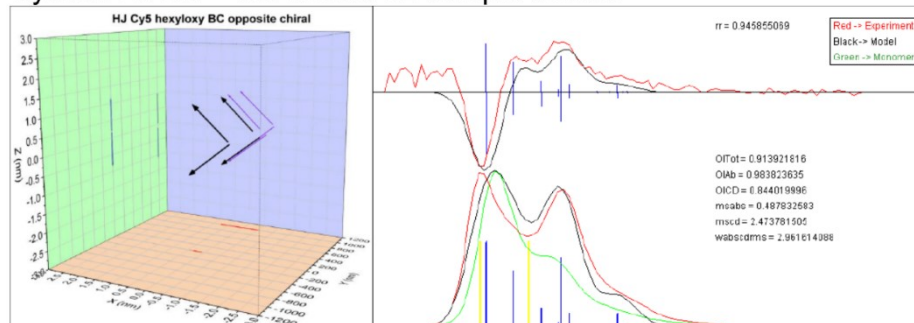

**Figure S11:** Three KRM fittings of Cy5hex HJ BC denoting the single dimer fitting (top), a result where the fit was improved by using two dimers which resulted in an H-like and J-like dimer pair (middle), a third fit which was also improved where the resulting packing was two dimers of oblique nature with opposite chirality.

**Table S3:** Comparison of coupling strength for dimers presenting heterogeneous configuration, suggested by the KRM modeling.

| Structure | Single Dimer |                 | Two dimers |                 |          |                 |
|-----------|--------------|-----------------|------------|-----------------|----------|-----------------|
|           | Type         | $J_{m,n}$ [meV] | Dimer I    |                 | Dimer II |                 |
|           |              |                 | Type       | $J_{m,n}$ [meV] | Type     | $J_{m,n}$ [meV] |
| Cy5Cl AB  | oblique      | 52.8            | H-like     | 62.8            | oblique  | 47.8            |
| Cy5Cl AD  | oblique      | 48.9            | oblique    | 60.2            | oblique  | 60.0            |
| Cy5Cl CD  | oblique      | 48.0            | oblique    | 59.4            | oblique  | 57.2            |
| Cy5Peg AD | oblique      | 57.0            | H-like     | 82.2            | J-like   | -53.2           |
| Cy5Peg BC | oblique      | 55.1            | J-like     | -44.2           | H-like   | 85.4            |
| Cy5hex AD | H            | 109.4           | oblique    | 67.8            | oblique  | 96.6            |
| Cy5hex CD | H            | 95.5            | oblique    | 77.8            | oblique  | 67.4            |
| Cy5hex BC | oblique      | 57.7            | oblique    | 59.5            | oblique  | 62.1            |

The oblique type configuration of dimer I and dimer II indicate that they are chiral opposites of the same packing, thereby they have similar coupling strength. When two  $J_{m,n}$  are reported that is because the coupling strength is unique to each dimer. The coupling strength is presented in the same order as the dimer type in the column to the left.

Of the 30 structures we looked at the majority (73%) were fit optimally by a single dimer KRM approach. In the remaining systems, five of the eight, had improved fits by assuming two dimers of the same type (still oblique) with opposite chiral orientations. These cases do not modify the interpretation of the parameters of the Cy5-R that determine dimer structure in DNA HJ templates. The more interesting cases are where the ‘Double Dimer’ fitting shift the prediction from one configuration in the single dimer to either a different configuration (e.g. Cy5hex AD) or a heterogeneous mixture (e.g. Cy5Peg AD). In all cases, the dimers in the ‘Double Dimers’ do not couple between each other as seen below. The cases where two dimer configurations are proposed open up the possibility of greater heterogeneity within the structures, though again we highlight that our modeling inherently fixes the distribution at 50% of each dimer. With our current spectroscopy approaches we cannot parse the validity of the hypothesis. Work is underway utilizing more advanced approaches to test for heterogeneity within structures, particularly looking for the J-like dimers in Cy5Peg AD and BC, which will be the focus of future manuscripts.

### Single Cy5Cl Dimer

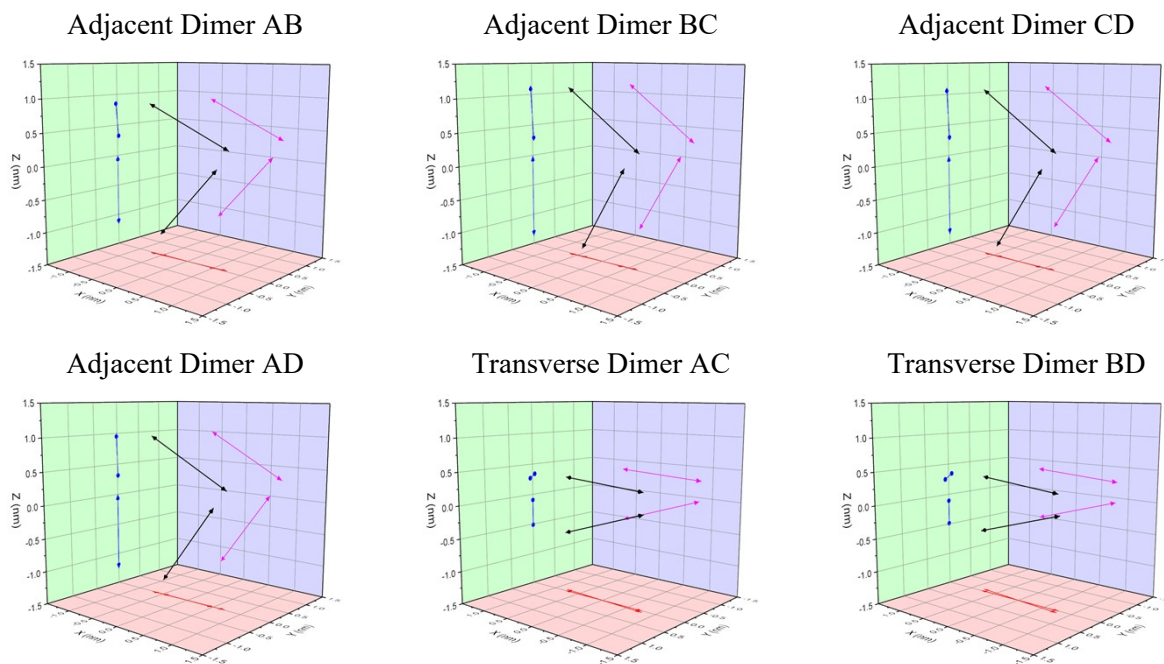

**Figure S12.** Three-dimensional vector plots of the KRM single dimer positions for Cy5Cl showing the different plane projections XY, XZ, and YZ.

### Two Cy5Cl Dimers

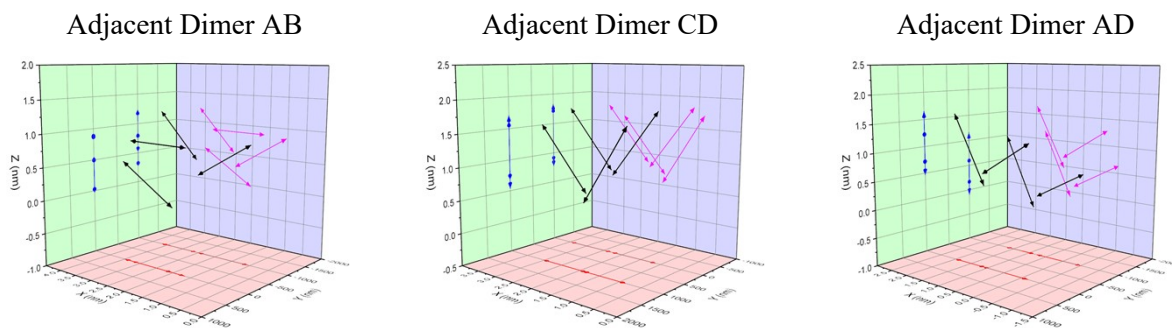

**Figure S13.** Three-dimensional vector plots of the KRM two dimer positions for Cy5Cl showing the different plane projections XY, XZ, and YZ.

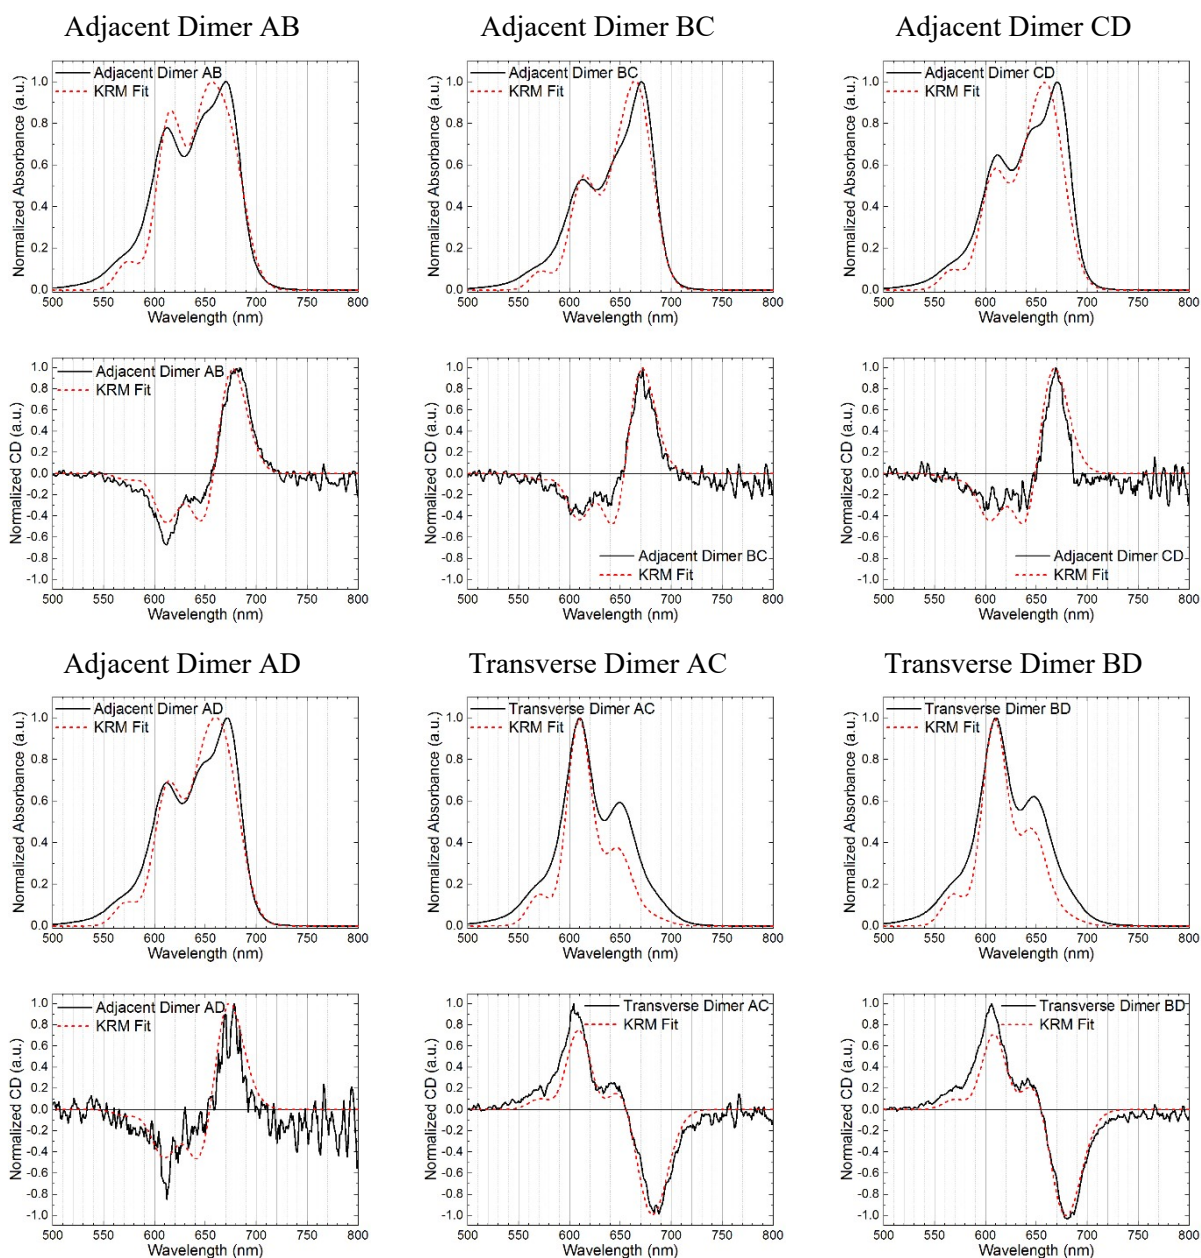

**Figure S14.** Normalized obtained steady-state absorption and circular dichroism spectra (solid line) of Cy5Cl covalently templated by DNA HJ with matching one dimer KRM Fit (dash-dot line). These spectra were recorded at 20 °C with the dye-DNA construct concentration at 2  $\mu$ M in 1 $\times$  TBE, 15 mM MgCl<sub>2</sub>.

## Two Cy5Cl Dimers: Absorbance and Circular Dichroism

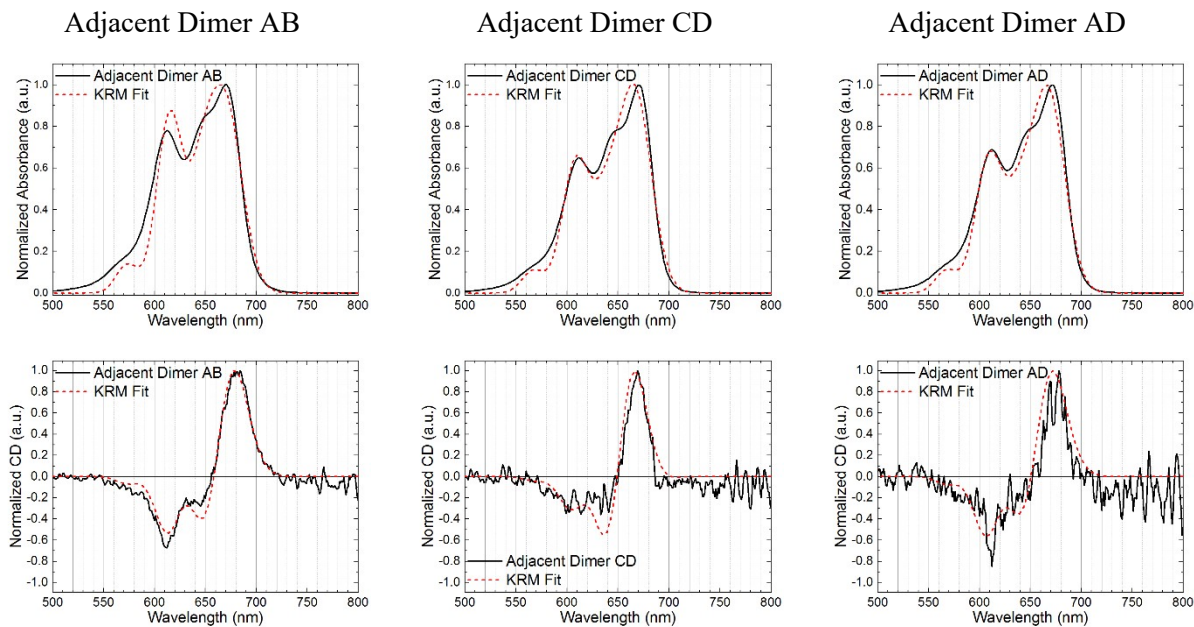

**Figure S15.** Normalized obtained steady-state absorption and circular dichroism spectra (solid line) of Cy5Cl covalently templated by DNA HJ with matching one dimer KRM Fit (dash-dot line). These spectra were recorded at 20 °C with the dye-DNA construct concentration at 2  $\mu$ M in 1 $\times$  TBE, 15 mM MgCl<sub>2</sub>.

**Table S4.** Various monomer parameters for Cy5Cl.

| Parameter                      | Monomer A | Monomer B | Monomer C | Monomer D |
|--------------------------------|-----------|-----------|-----------|-----------|
| $E_v$ (eV)                     | 0.135     | 0.136     | 0.138     | 0.143     |
| $d$ (dimensionless units)      | 0.807     | 0.805     | 0.815     | 0.820     |
| $\Gamma$ (eV)                  | 0.039     | 0.037     | 0.040     | 0.043     |
| $J_0^*$ (meV-nm <sup>3</sup> ) | 65.3      | 60.9      | 66.5      | 60.3      |
| $M^*$ (Debye)                  | 13.627    | 13.162    | 13.761    | 13.096    |



**Table S5.** Input fitting parameters used in calculations of single Cy5Cl dimers.

| Parameter                      | Adjacent AB | Adjacent BC | Adjacent CD | Adjacent AD | Transverse AC | Transverse BD |
|--------------------------------|-------------|-------------|-------------|-------------|---------------|---------------|
| $n_v$                          | 3           | 3           | 3           | 3           | 3             | 3             |
| $J_0^*$ (meV·nm <sup>3</sup> ) | 65.3        | 63.7        | 63.4        | 62.8        | 65.9          | 60.6          |
| $E_{of}$ (eV)                  | 0.020       | 0.012       | 0.024       | 0.028       | 0.032         | 0.014         |
| $E_v$ (eV)                     | 0.140       | 0.137       | 0.140       | 0.139       | 0.136         | 0.139         |
| $d$ (dimensionless units)      | 0.806       | 0.810       | 0.818       | 0.814       | 0.811         | 0.813         |
| $\Gamma$ (eV)                  | 0.039       | 0.038       | 0.041       | 0.041       | 0.039         | 0.040         |
| $l$ (nm)                       | 1.4         | 1.4         | 1.4         | 1.4         | 1.4           | 1.4           |
| $cdis$ (nm)                    | 0.34        | 0.34        | 0.34        | 0.34        | 0.34          | 0.34          |

\* $J_0$  was calculated from the fitting monomer absorption spectrum and used as an input parameter in the theoretical fitting of dimers. For dimers, each monomer  $J_0$  was averaged between the two participating dyes.

**Table S6.** Input fitting parameters used in calculations of two Cy5Cl dimers.

| Parameter                      | Adjacent, AB | Adjacent, CD | Adjacent, AD |
|--------------------------------|--------------|--------------|--------------|
| $n_v$                          | 3            | 3            | 3            |
| $J_0^*$ (meV·nm <sup>3</sup> ) | 65.3         | 63.4         | 62.8         |
| $E_{of}$ (eV)                  | 0.020        | 0.022        | 0.041        |
| $E_v$ (eV)                     | 0.14         | 0.14         | 0.139        |
| $d$ (dimensionless units)      | 0.806        | 0.818        | 0.814        |
| $\Gamma$ (eV)                  | 0.039        | 0.041        | 0.041        |
| $l$ (nm)                       | 1.4          | 1.4          | 1.4          |
| $cdis$ (nm)                    | 0.34         | 0.34         | 0.34         |

\* $J_0$  was calculated from the fitting monomer absorption spectrum and used as an input parameter in the theoretical fitting of dimers. For dimers, each monomer  $J_0$  was averaged between the two participating dyes.

**Table S7.** The goodness of the fit parameters for absorbance and CD spectra for Cy5Cl dimers (both for one and two dimers).

| <b>Construct</b>               | <b><i>r</i></b> | <b><i>OI<sub>AB</sub></i></b> | <b><i>OI<sub>CD</sub></i></b> | <b><i>OI<sub>Tot</sub></i></b> | <b><i>MSD<sub>abs</sub></i></b> | <b><i>MSD<sub>cd</sub></i></b> | <b><i>w<sub>abscd</sub>rms</i></b> |
|--------------------------------|-----------------|-------------------------------|-------------------------------|--------------------------------|---------------------------------|--------------------------------|------------------------------------|
| <b>Adjacent Dimer, AB</b>      | 0.962           | 0.987                         | 0.960                         | 0.973                          | 0.359                           | 0.547                          | 0.907                              |
| <b>Adjacent Dimer, BC</b>      | 0.982           | 0.988                         | 0.947                         | 0.968                          | 0.218                           | 0.647                          | 0.866                              |
| <b>Adjacent Dimer, CD</b>      | 1.013           | 0.981                         | 0.910                         | 0.946                          | 0.432                           | 1.212                          | 1.644                              |
| <b>Adjacent Dimer, AD</b>      | 1.010           | 0.987                         | 0.808                         | 0.898                          | 0.303                           | 2.322                          | 0.303                              |
| <b>Transverse Dimer, AC</b>    | 1.008           | 0.973                         | 0.963                         | 0.968                          | 0.694                           | 0.759                          | 1.454                              |
| <b>Transverse Dimer, BD</b>    | 0.998           | 0.980                         | 0.974                         | 0.977                          | 0.544                           | 0.626                          | 1.170                              |
| <b>Two Adjacent Dimers, AB</b> | 0.999           | 0.989                         | 0.975                         | 0.982                          | 0.300                           | 0.340                          | 1.498                              |
| <b>Two Adjacent Dimers, CD</b> | 1.000           | 0.995                         | 0.914                         | 0.955                          | 0.115                           | 0.981                          | 1.096                              |
| <b>Two Adjacent Dimers, AD</b> | 1.026           | 0.995                         | 0.825                         | 0.910                          | 0.118                           | 2.231                          | 2.349                              |

**Table S8.** Kühn-Renger-May model fitting outputs describing each dye orientation and position in Cy5Cl dimers for one dimer.

| Dye                         | $\theta_i$ (°) | $\varphi_i$ (°) | $x_i$ (nm) | $y_i$ (nm) | $z_i$ (nm) |
|-----------------------------|----------------|-----------------|------------|------------|------------|
| <b>Adjacent Dimer, AB</b>   |                |                 |            |            |            |
| Dye 1                       | 43.3           | 0.0             | 0.000      | 0.000      | -0.586     |
| Dye 2                       | 112.1          | 2.2             | 0.000      | 0.000      | 0.586      |
| <b>Adjacent Dimer, BC</b>   |                |                 |            |            |            |
| Dye 1                       | 30.9           | 0.0             | 0.000      | 0.000      | -0.689     |
| Dye 2                       | 124.4          | 2.5             | 0.000      | 0.000      | 0.689      |
| <b>Adjacent Dimer, CD</b>   |                |                 |            |            |            |
| Dye 1                       | 33.5           | 0.0             | 0.000      | 0.000      | -0.676     |
| Dye 2                       | 122.5          | 2.0             | 0.000      | 0.000      | 0.676      |
| <b>Adjacent Dimer, AD</b>   |                |                 |            |            |            |
| Dye 1                       | 37.8           | 0.0             | 0.000      | 0.000      | -0.631     |
| Dye 2                       | 116.9          | 1.1             | 0.000      | 0.000      | 0.631      |
| <b>Transverse Dimer, AC</b> |                |                 |            |            |            |
| Dye 1                       | 107.3          | 0.0             | 0.000      | 0.000      | -0.304     |
| Dye 2                       | 87.4           | -4.2            | 0.000      | 0.000      | 0.304      |
| <b>Transverse Dimer, BD</b> |                |                 |            |            |            |
| Dye 1                       | 105.6          | 0.0             | 0.000      | 0.000      | -0.297     |
| Dye 2                       | 86.5           | -6.0            | 0.000      | 0.000      | 0.297      |

**Table S9.** Kühn-Renger-May model fitting outputs describing each dye in standard orientation and position in Cy5Cl dimers for two dimers.

| Dye                            | $\theta_i$ (°) | $\varphi_i$ (°) | $x_i$ (nm) | $y_i$ (nm) | $z_i$ (nm) |
|--------------------------------|----------------|-----------------|------------|------------|------------|
| <b>Two Adjacent Dimers, AB</b> |                |                 |            |            |            |
| Dye 1                          | 64.2           | 0.0             | 0.000      | 0.000      | -0.361     |
| Dye 2                          | 87.6           | 4.0             | 0.000      | 0.000      | 0.361      |
| Dye 3                          | 43.9           | 0.0             | 0.000      | 0.000      | -0.765     |
| Dye 4                          | 160.5          | 2.1             | 0.000      | 0.000      | 0.765      |
| <b>Two Adjacent Dimers, CD</b> |                |                 |            |            |            |
| Dye 1                          | 42.7           | 0.0             | 0.000      | 0.000      | -0.602     |
| Dye 2                          | 130.8          | -33.2           | 0.000      | 0.000      | 0.602      |
| Dye 3                          | 48.7           | 0.0             | 0.000      | 0.000      | -0.534     |
| Dye 4                          | 130.4          | 38.3            | 0.000      | 0.000      | 0.534      |
| <b>Two Adjacent Dimers, AD</b> |                |                 |            |            |            |
| Dye 1                          | 47.1           | 0.0             | 0.000      | 0.000      | -0.547     |
| Dye 2                          | 131.1          | 36.8            | 0.000      | 0.000      | 0.547      |
| Dye 3                          | 50.0           | 0.0             | 0.000      | 0.000      | -0.589     |
| Dye 4                          | 135.3          | -32.1           | 0.000      | 0.000      | 0.589      |

\* Standard orientation and position of Dimer I (dyes 1 & 2) and Dimer II (dyes 3 & 4) separated by ~1,000 nm.

**Table S10.** Calculated  $J_{m,n}$ , and geometric parameters of Cy5Cl dimers (both for one and two dimers).

| <b>Dimer Aggregate</b>         | $J_{m,n}$ (meV) | $R$ , (Å) | $d_{min}$ (nm) | $\alpha$ (°) | $\theta_{1s}$ (°) | $\theta_{2s}$ (°) | $\theta_t$ (°) |
|--------------------------------|-----------------|-----------|----------------|--------------|-------------------|-------------------|----------------|
| <b>Adjacent, AB</b>            | 52.8            | 1.17      | 0.34           | 68.9         | 43.3              | 67.9              | 2.2            |
| <b>Adjacent, BC</b>            | 48.1            | 1.38      | 0.34           | 86.5         | 30.9              | 55.6              | 2.5            |
| <b>Adjacent, CD</b>            | 48.0            | 1.35      | 0.34           | 89.1         | 33.5              | 57.5              | 2.0            |
| <b>Adjacent, AD</b>            | 48.9            | 1.26      | 0.34           | 79.2         | 37.8              | 63.1              | 1.1            |
| <b>Transverse, AC</b>          | 85.0            | 0.61      | 0.34           | 20.4         | 72.7              | 87.4              | -4.2           |
| <b>Transverse, BD</b>          | 79.5            | 0.59      | 0.34           | 20.0         | 74.4              | 86.5              | -6.0           |
| <b>Two Adjacent dimers, AB</b> | 62.8            | 0.72      | 0.41           | 23.7         | 64.2              | 87.6              | 4.0            |
|                                | 47.8            | 1.53      | 0.35           | 63.4         | 43.9              | 19.5              | 2.1            |
| <b>Two Adjacent dimers, CD</b> | 59.4            | 1.20      | 0.34           | 87.0         | 42.7              | 49.2              | -33.2          |
|                                | 57.2            | 1.07      | 0.38           | 88.8         | 48.7              | 49.6              | 38.3           |
| <b>Two Adjacent dimers, AD</b> | 60.2            | 1.09      | 0.36           | 89.6         | 47.1              | 48.9              | 36.8           |
|                                | 60.0            | 1.18      | 0.34           | 90.0         | 50.0              | 44.7              | -32.1          |

### Single Cy5Peg Dimer

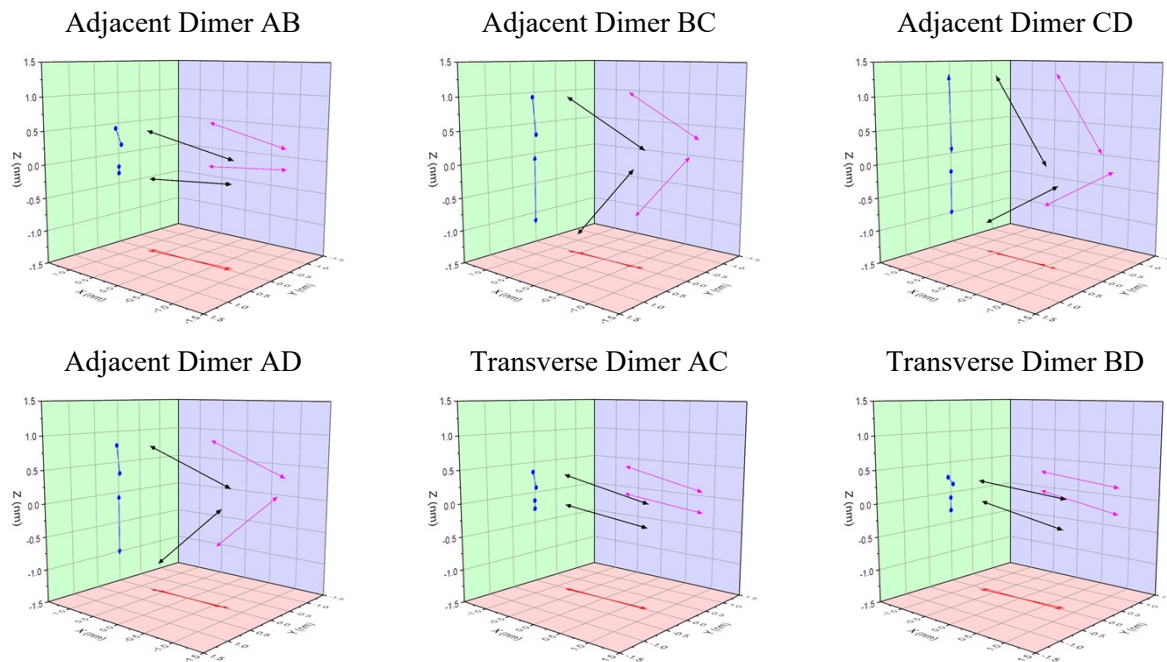

**Figure S16.** Three-dimensional vector plots of the KRM single dimer positions for Cy5Peg showing the different plane projections XY, XZ, and YZ.

### Two Cy5Peg Dimers

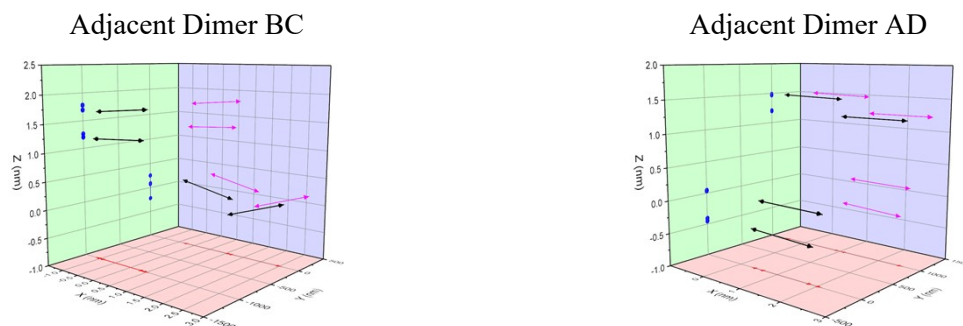

**Figure S17.** Three-dimensional vector plots of the KRM two dimer positions for Cy5Peg showing the different plane projections XY, XZ, and YZ.



## Single Cy5Peg Dimer: Absorbance and Circular Dichroism

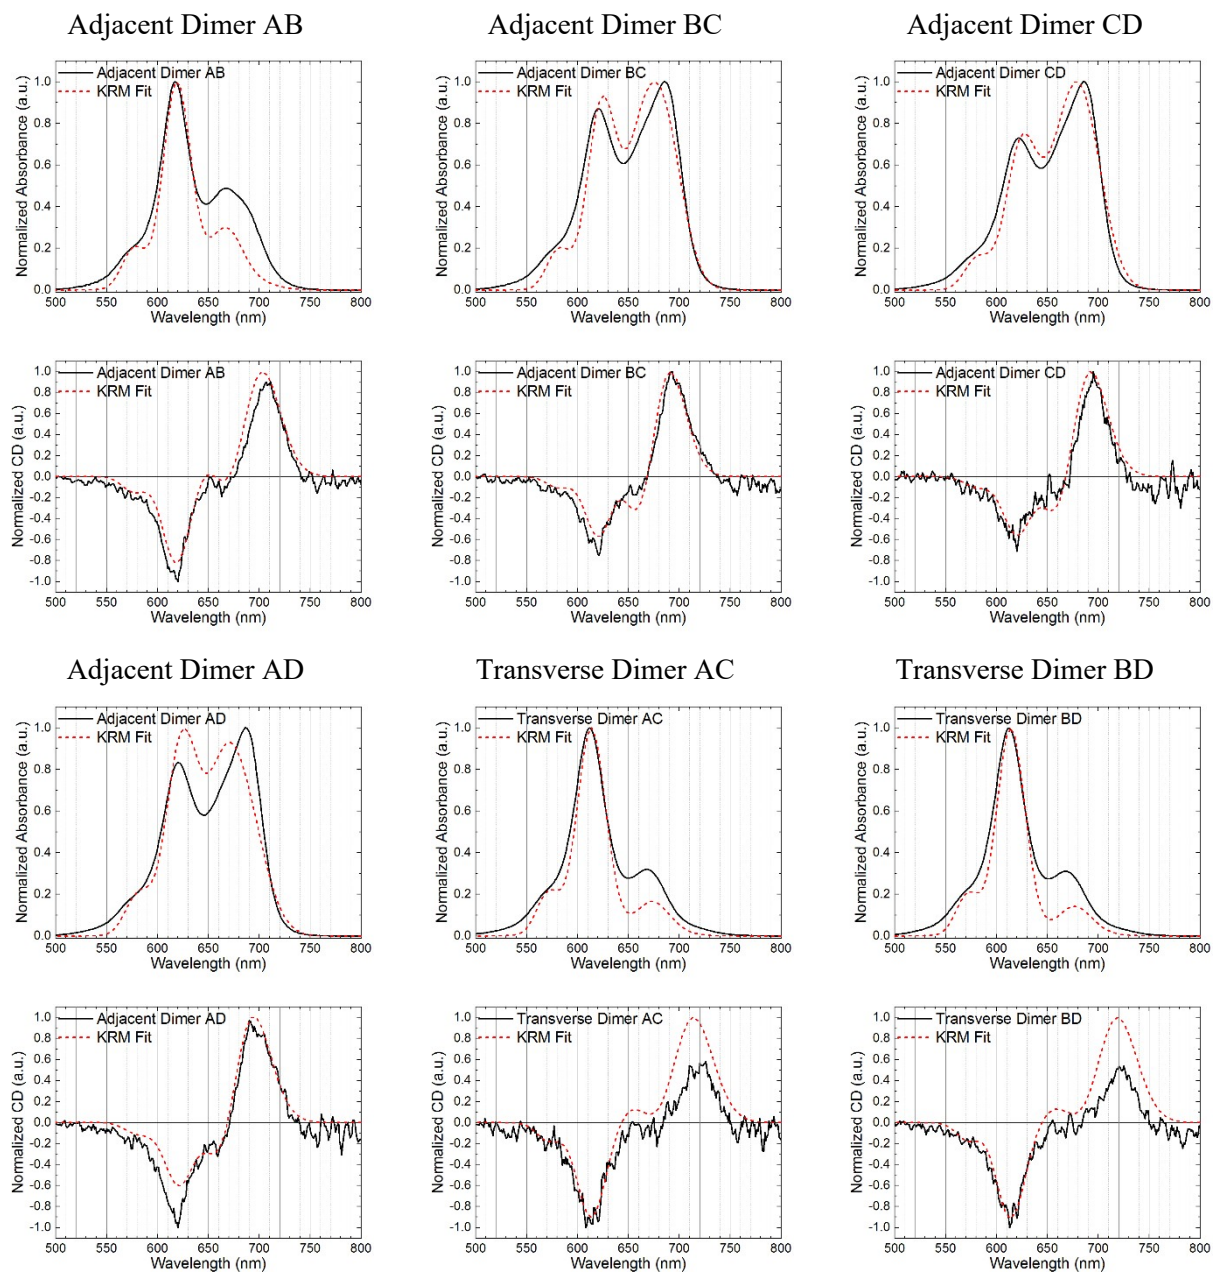

**Figure S18.** Normalized obtained steady-state absorbance and circular dichroism spectra (solid line) of Cy5Peg covalently templated by DNA HJ with matching one dimer KRM Fit (dash-dot line). These spectra were recorded at 20 °C with the dye-DNA construct concentration at 2 μM in 1× TBE, 15 mM MgCl<sub>2</sub>.

## Two Cy5Peg Dimers: Absorbance and Circular Dichroism

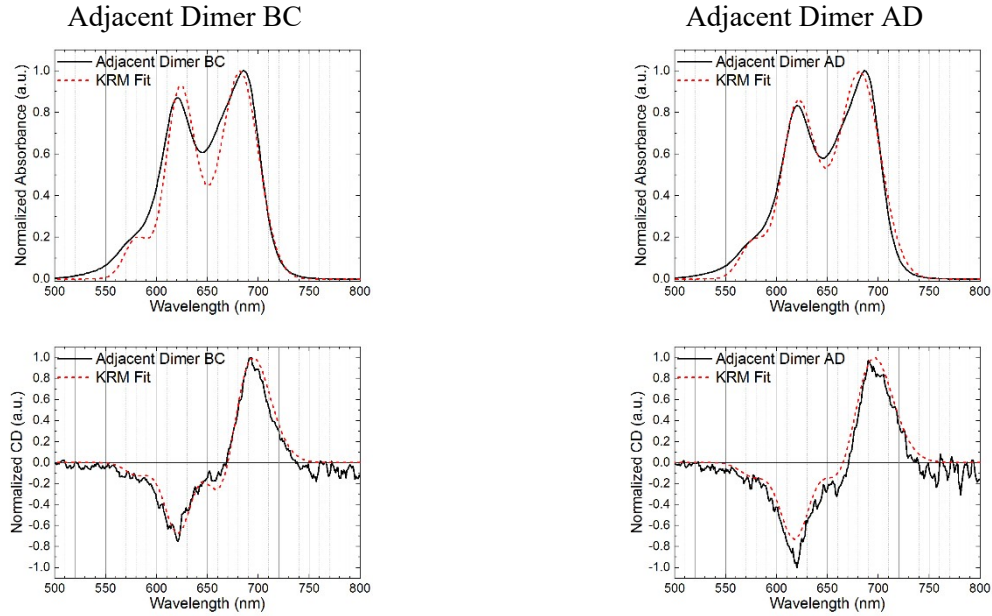

**Figure S19.** Normalized obtained steady-state absorption and circular dichroism spectra (solid line) of Cy5Peg covalently templated by DNA HJ with matching one dimer KRM Fit (dash-dot line). These spectra were recorded at 20 °C with the dye-DNA construct concentration at 2  $\mu$ M in 1 $\times$  TBE, 15 mM MgCl<sub>2</sub>.

**Table S11.** Various monomer parameters for Cy5Peg.

| Parameter                    | Monomer A | Monomer B | Monomer C | Monomer D |
|------------------------------|-----------|-----------|-----------|-----------|
| $E_v$ (eV)                   | 0.140     | 0.138     | 0.140     | 0.143     |
| $d$ (dimensionless units)    | 0.944     | 0.920     | 0.944     | 0.926     |
| $\Gamma$ (eV)                | 0.047     | 0.041     | 0.045     | 0.049     |
| $J_0$ (meV-nm <sup>3</sup> ) | 68.0      | 70.0      | 68.5      | 65.4      |
| $M$ (Debye)                  | 13.911    | 14.112    | 13.957    | 13.641    |

**Table S12.** Input fitting parameters used in calculations of single Cy5Peg dimers.

| <b>Parameter</b>                | <b>Adjacent<br/>AB</b> | <b>Adjacent<br/>BC</b> | <b>Adjacent<br/>CD</b> | <b>Adjacent<br/>AD</b> | <b>Transverse<br/>AC</b> | <b>Transverse<br/>BD</b> |
|---------------------------------|------------------------|------------------------|------------------------|------------------------|--------------------------|--------------------------|
| $n_v$                           | 3                      | 3                      | 3                      | 3                      | 3                        | 3                        |
| $J_0^*$ (meV·nm <sup>3</sup> )  | 69.0                   | 69.2                   | 66.9                   | 66.7                   | 68.2                     | 67.7                     |
| $E_{of}$ (eV)                   | 0.010                  | 0.014                  | 0.000                  | 0.006                  | 0.008                    | 0.006                    |
| Energy of vibron,<br>$E_v$ (eV) | 0.139                  | 0.139                  | 0.141                  | 0.141                  | 0.140                    | 0.140                    |
| $d$ (dimensionless<br>units)    | 0.930                  | 0.932                  | 0.935                  | 0.933                  | 0.942                    | 0.923                    |
| $\Gamma$ (eV)                   | 0.0439                 | 0.0430                 | 0.0470                 | 0.0479                 | 0.0459                   | 0.0450                   |
| $l$ (nm)                        | 1.4                    | 1.4                    | 1.4                    | 1.4                    | 1.4                      | 1.4                      |
| $cdis$ (nm)                     | 0.34                   | 0.34                   | 0.34                   | 0.34                   | 0.34                     | 0.34                     |

\* $J_0$  was calculated from the fitting monomer absorption spectrum and used as an input parameter in the theoretical fitting of dimers. For dimers, each monomer  $J_0$  was averaged between the two participating dyes.

**Table S13.** Input fitting parameters used in calculations of two Cy5Peg dimers.

| <b>Parameter</b>               | <b>Adjacent, BC</b> | <b>Adjacent, AD</b> |
|--------------------------------|---------------------|---------------------|
| $n_v$                          | 3                   | 3                   |
| $J_0^*$ (meV·nm <sup>3</sup> ) | 69.2                | 66.7                |
| $E_{of}$ (eV)                  | 0.010               | 0.015               |
| $E_v$ (eV)                     | 0.139               | 0.141               |
| $d$ (dimensionless units)      | 0.932               | 0.933               |
| $\Gamma$ (eV)                  | 0.0430              | 0.0479              |
| $l$ (nm)                       | 1.4                 | 1.4                 |
| $cdis$ (nm)                    | 0.34                | 0.34                |

\* $J_0$  was calculated from the fitting monomer absorption spectrum and used as an input parameter in the theoretical fitting of dimers. For dimers, each monomer  $J_0$  was averaged between the two participating dyes.

**Table S14.** The goodness of the fit parameters for absorbance and CD spectra for Cy5Peg dimers (both for one and two dimers).

| <b>Construct</b>               | <b><i>r</i></b> | <b><i>OI<sub>AB</sub></i></b> | <b><i>OI<sub>CD</sub></i></b> | <b><i>OI<sub>Tot</sub></i></b> | <b><i>MSD<sub>abs</sub></i></b> | <b><i>MSD<sub>cd</sub></i></b> | <b><i>w<sub>abscd</sub>rms</i></b> |
|--------------------------------|-----------------|-------------------------------|-------------------------------|--------------------------------|---------------------------------|--------------------------------|------------------------------------|
| <b>Adjacent Dimer, AB</b>      | 1.015           | 0.970                         | 0.963                         | 0.966                          | 0.625                           | 0.686                          | 1.310                              |
| <b>Adjacent Dimer, BC</b>      | 1.016           | 0.987                         | 0.968                         | 0.977                          | 0.391                           | 0.469                          | 0.859                              |
| <b>Adjacent Dimer, CD</b>      | 1.006           | 0.991                         | 0.949                         | 0.970                          | 0.231                           | 0.763                          | 0.994                              |
| <b>Adjacent Dimer, AD</b>      | 0.996           | 0.976                         | 0.952                         | 0.964                          | 0.763                           | 1.023                          | 1.786                              |
| <b>Transverse Dimer, AC</b>    | 1.004           | 0.980                         | 0.878                         | 0.929                          | 0.371                           | 2.581                          | 2.953                              |
| <b>Transverse Dimer, BD</b>    | 1.003           | 0.975                         | 0.893                         | 0.934                          | 0.458                           | 2.377                          | 2.835                              |
| <b>Two Adjacent Dimers, BC</b> | 1.001           | 0.990                         | 0.977                         | 0.983                          | 0.332                           | 0.368                          | 0.700                              |
| <b>Two Adjacent Dimers, AD</b> | 1.010           | 0.997                         | 0.965                         | 0.981                          | 0.090                           | 0.717                          | 0.808                              |

**Table S15.** Kühn-Renger-May model fitting outputs describing each dye orientation and position in Cy5Peg single dimers.

| Dye                         | $\theta_i$ (°) | $\varphi_i$ (°) | $x_i$ (nm) | $y_i$ (nm) | $z_i$ (nm) |
|-----------------------------|----------------|-----------------|------------|------------|------------|
| <b>Adjacent Dimer, AB</b>   |                |                 |            |            |            |
| Dye 1                       | 94.5           | 0.0             | 0.000      | 0.000      | -0.277     |
| Dye 2                       | 78.5           | 5.2             | 0.000      | 0.000      | 0.277      |
| <b>Adjacent Dimer, BC</b>   |                |                 |            |            |            |
| Dye 1                       | 137.0          | 0.0             | 0.000      | 0.000      | -0.614     |
| Dye 2                       | 64.0           | 3.2             | 0.000      | 0.000      | 0.614      |
| <b>Adjacent Dimer, CD</b>   |                |                 |            |            |            |
| Dye 1                       | 119.1          | 0.0             | 0.000      | 0.000      | -0.648     |
| Dye 2                       | 36.2           | 2.4             | 0.000      | 0.000      | 0.648      |
| <b>Adjacent Dimer, AD</b>   |                |                 |            |            |            |
| Dye 1                       | 129.6          | 0.0             | 0.000      | 0.000      | -0.542     |
| Dye 2                       | 70.7           | 2.3             | 0.000      | 0.000      | 0.542      |
| <b>Transverse Dimer, AC</b> |                |                 |            |            |            |
| Dye 1                       | 95.6           | 0.0             | 0.000      | 0.000      | -0.207     |
| Dye 2                       | 100.8          | 2.7             | 0.000      | 0.000      | 0.207      |
| <b>Transverse Dimer, BD</b> |                |                 |            |            |            |
| Dye 1                       | 98.7           | 0.0             | 0.000      | 0.000      | -0.194     |
| Dye 2                       | 95.0           | 4.5             | 0.000      | 0.000      | 0.194      |

**Table S16.** Kühn-Renger-May model fitting outputs describing each dye in standard orientation and position in Cy5Peg two dimers.

| Dye                            | $\theta_i$ (°) | $\varphi_i$ (°) | $x_i$ (nm) | $y_i$ (nm) | $z_i$ (nm) |
|--------------------------------|----------------|-----------------|------------|------------|------------|
| <b>Two Adjacent Dimers, BC</b> |                |                 |            |            |            |
| <b>Dye 1</b>                   | 150.6          | 0.0             | 0.000      | 0.000      | -0.754     |
| <b>Dye 2</b>                   | 173.4          | -42.8           | 0.000      | 0.000      | 0.754      |
| <b>Dye 3</b>                   | 74.7           | 0.0             | 0.000      | 0.000      | -0.264     |
| <b>Dye 4</b>                   | 72.6           | 4.6             | 0.000      | 0.000      | 0.264      |
| <b>Two Adjacent Dimers, AD</b> |                |                 |            |            |            |
| <b>Dye 1</b>                   | 66.7           | 0.0             | 0.000      | 0.000      | -0.261     |
| <b>Dye 2</b>                   | 66.0           | 6.3             | 0.000      | 0.000      | 0.261      |
| <b>Dye 3</b>                   | 12.5           | 0.0             | 0.000      | 0.000      | -0.818     |
| <b>Dye 4</b>                   | 12.8           | -9.1            | 0.000      | 0.000      | 0.818      |

\*Standard orientation and position of Dimer I (dyes 1 & 2) and Dimer II (dyes 3 & 4) separated by ~1,000 nm.



**Table S17.** Calculated  $J_{m,n}$ , and geometric parameters of Cy5Peg dimers (both for one and two dimers).

| Dimer Aggregate                | $J_{m,n}$ (meV) | $R$ , (Å) | $d_{min}$ (nm) | $\alpha$ (°) | $\theta_{1s}$ (°) | $\theta_{2s}$ (°) | $\theta_t$ (°) |
|--------------------------------|-----------------|-----------|----------------|--------------|-------------------|-------------------|----------------|
| <b>Adjacent, AB</b>            | 95.8            | 0.55      | 0.34           | 16.8         | 85.5              | 78.5              | 5.2            |
| <b>Adjacent, BC</b>            | 55.1            | 1.23      | 0.34           | 73.1         | 43.0              | 64.0              | 3.2            |
| <b>Adjacent, CD</b>            | 51.6            | 1.30      | 0.34           | 82.9         | 60.9              | 36.2              | 2.4            |
| <b>Adjacent, AD</b>            | 57.0            | 1.08      | 0.34           | 58.9         | 50.4              | 70.7              | 2.3            |
| <b>Transverse, AC</b>          | 124.0           | 0.41      | 0.34           | 5.8          | 84.4              | 79.2              | 2.7            |
| <b>Transverse, BD</b>          | 131.0           | 0.39      | 0.34           | 5.8          | 81.3              | 85.0              | 4.5            |
| <b>Two Adjacent dimers, BC</b> | -44.2           | 1.51      | 0.41           | 24.9         | 29.4              | 6.6               | -42.8          |
|                                | 85.4            | 0.53      | 0.49           | 4.9          | 74.7              | 72.6              | 4.6            |
| <b>Two Adjacent dimers, AD</b> | 82.2            | 0.52      | 0.48           | 5.8          | 66.7              | 66.0              | 6.3            |
|                                | -53.2           | 1.64      | 0.36           | 2.0          | 12.5              | 12.8              | -9.1           |

Single Cy5hex Dimer

Adjacent Dimer AB

Adjacent Dimer BC

Adjacent Dimer CD

## Single Cy5hex Dimer: Absorbance and Circular Dichroism

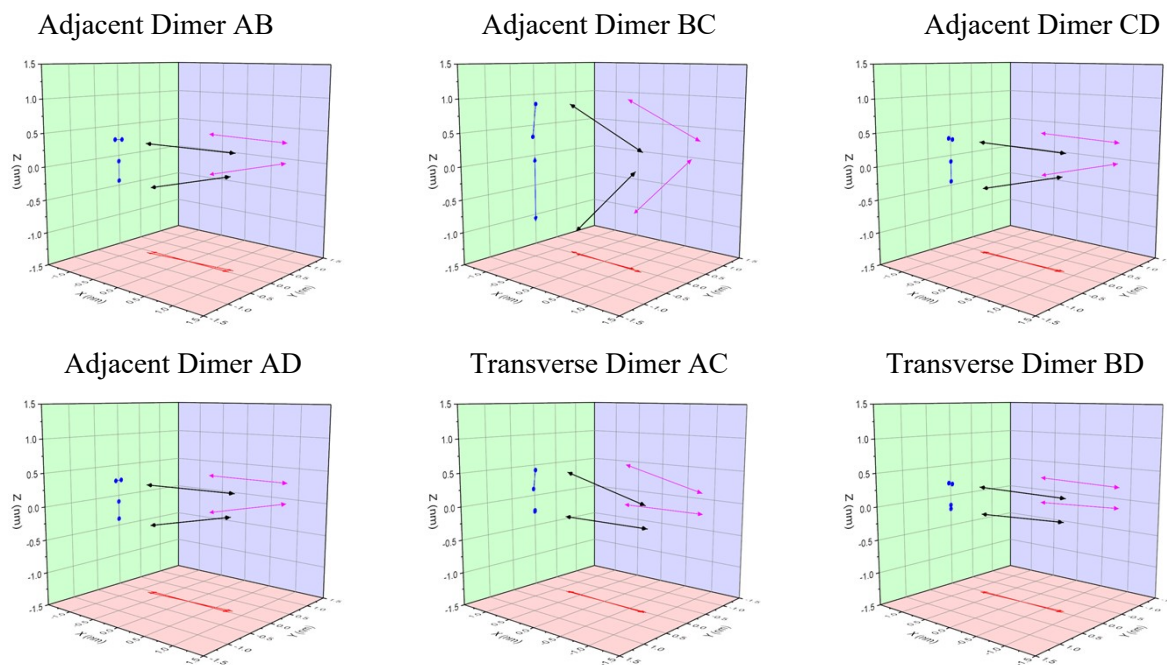

**Figure S19.** Three-dimensional vector plots of the KRM single dimer positions for Cy5hex showing the different plane projections XY, XZ, and YZ.

## Two Cy5hex dimers

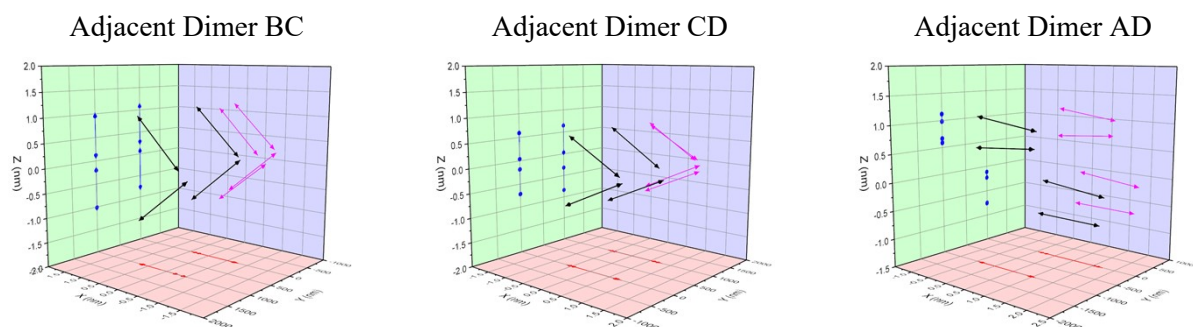

**Figure S20.** Three-dimensional vector plots of the KRM two dimer positions for Cy5hex showing the different plane projections XY, XZ, and YZ.

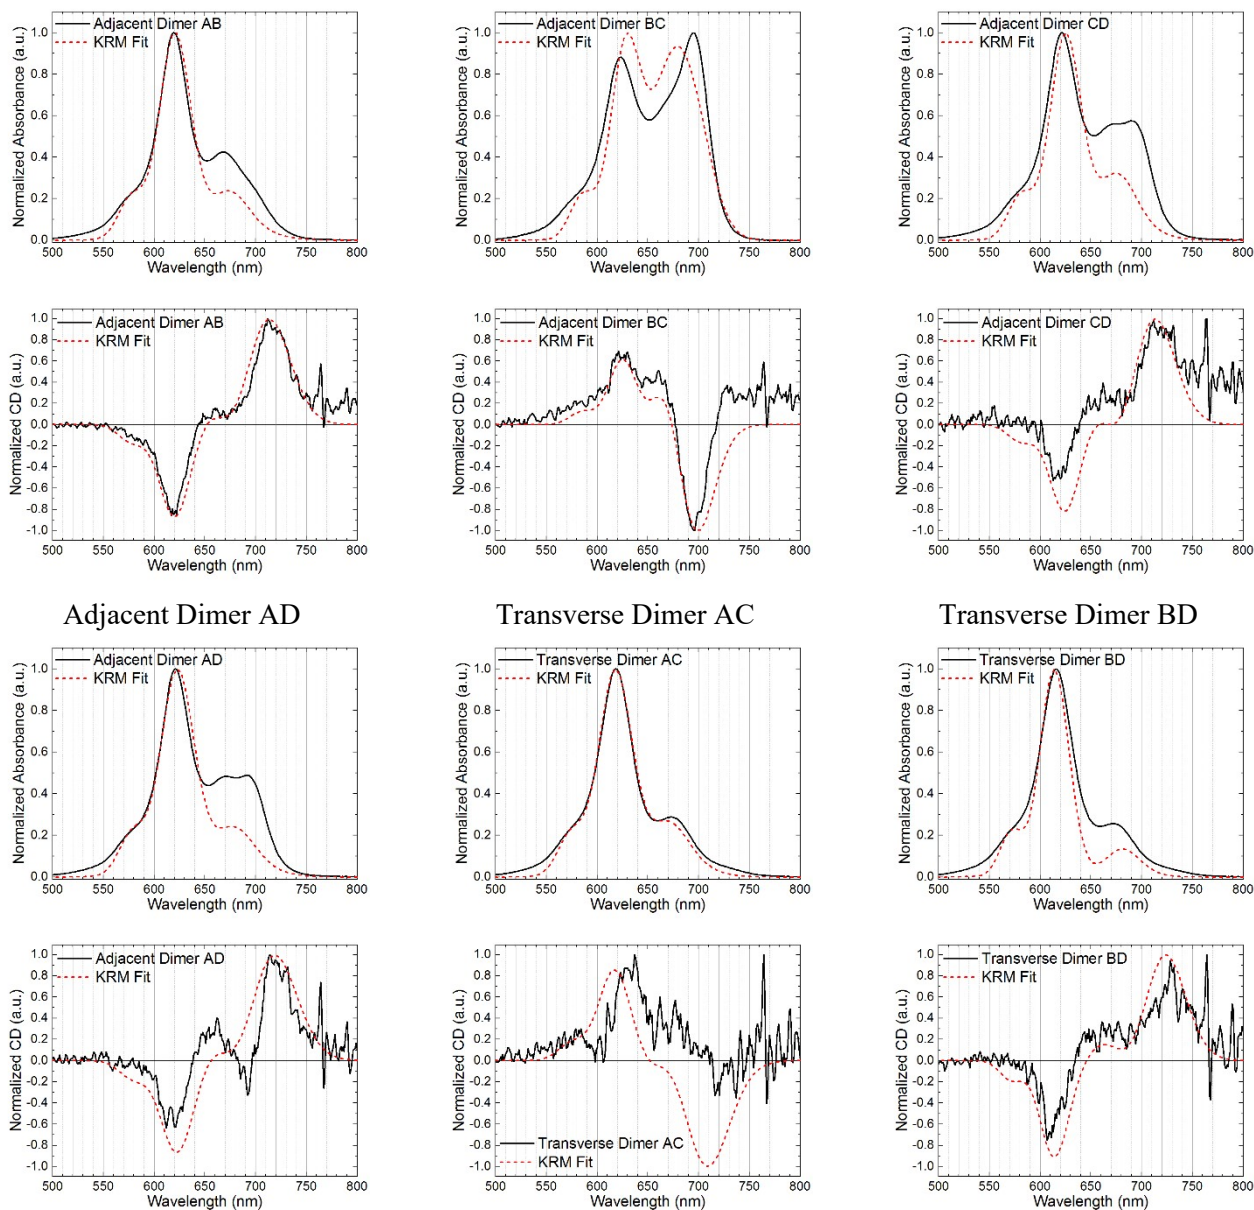

**Figure S21.** Normalized obtained steady-state absorption and circular dichroism spectra (solid line) of Cy5hex covalently templated by DNA HJ with matching one dimer KRM Fit (dash-dot line). These spectra were recorded at 20 °C with the dye-DNA construct concentration at 2  $\mu$ M in 1 $\times$  TBE, 15 mM MgCl<sub>2</sub>.

### Two Cy5hex Dimers: Absorbance and Circular Dichroism

Adjacent Dimer BC

Adjacent Dimer CD

Adjacent Dimer AD

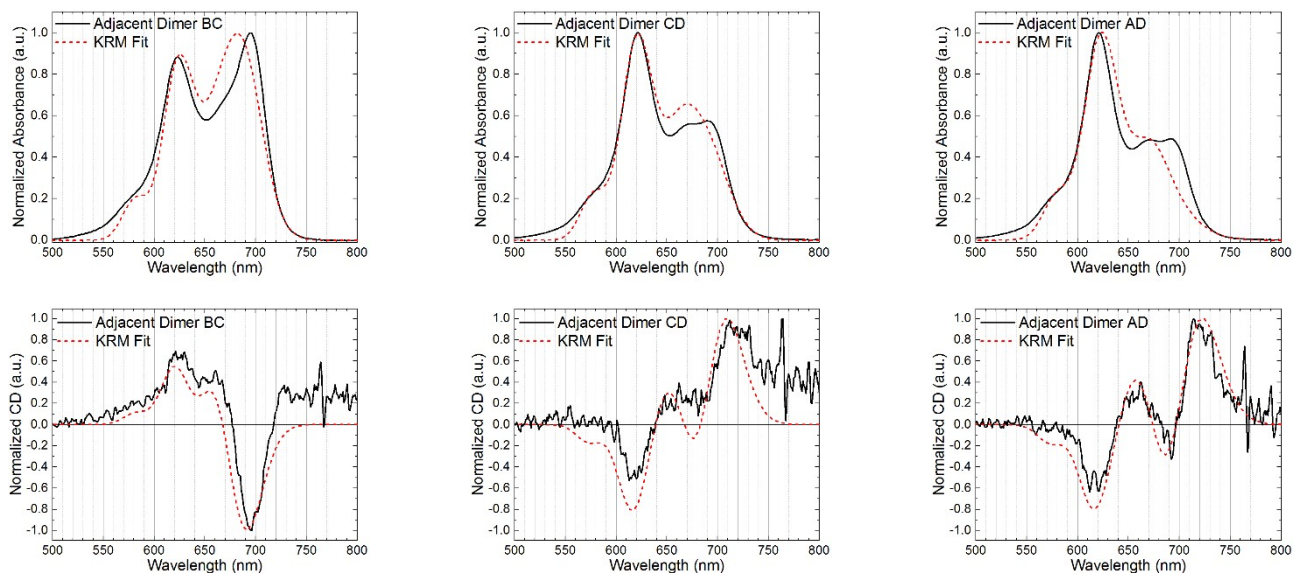

**Figure S22.** Normalized obtained steady-state absorption and circular dichroism spectra (solid line) of Cy5hex covalently templated by DNA HJ with matching one dimer KRM Fit (dash-dot line). These spectra were recorded at 20 °C with the dye-DNA construct concentration at 2  $\mu$ M in 1 $\times$  TBE, 15 mM MgCl<sub>2</sub>.

**Table S18.** Monomer parameters for Cy5hex.

| Parameter                    | Monomer A | Monomer B | Monomer C | Monomer D |
|------------------------------|-----------|-----------|-----------|-----------|
| $E_v$ (eV)                   | 0.141     | 0.137     | 0.141     | 0.144     |
| $d$ (dimensionless units)    | 0.958     | 0.946     | 0.969     | 0.971     |
| $\Gamma$ (eV)                | 0.057     | 0.043     | 0.049     | 0.048     |
| $J_0$ (meV-nm <sup>3</sup> ) | 75.4      | 72.8      | 67.2      | 67.7      |
| $M$ (Debye)                  | 14.645    | 14.389    | 13.823    | 13.885    |

**Table S19.** Input fitting parameters used in calculations of single Cy5hex dimers.

| Parameter                      | Adjacent AB | Adjacent BC | Adjacent CD | Adjacent AD | Transverse AC | Transverse BD |
|--------------------------------|-------------|-------------|-------------|-------------|---------------|---------------|
| $n_v$                          | 3           | 3           | 3           | 3           | 3             | 3             |
| $J_0^*$ (meV·nm <sup>3</sup> ) | 74.1        | 70.0        | 67.4        | 71.6        | 71.3          | 70.3          |
| $E_{of}$ (eV)                  | 0.014       | 0.004       | -0.010      | 0.002       | 0.022         | 0.006         |
| $E_v$ (eV)                     | 0.139       | 0.139       | 0.142       | 0.142       | 0.141         | 0.140         |
| $d$ (dimensionless units)      | 0.9520      | 0.9572      | 0.9699      | 0.9647      | 0.9635        | 0.9583        |
| $\Gamma$ (eV)                  | 0.0498      | 0.0460      | 0.0485      | 0.0523      | 0.0528        | 0.0455        |
| $l$ (nm)                       | 1.4         | 1.4         | 1.4         | 1.4         | 1.4           | 1.4           |
| $cdis$ (nm)                    | 0.34        | 0.34        | 0.34        | 0.34        | 0.34          | 0.34          |

\* $J_0$  was calculated from the fitting monomer absorption spectrum and used as an input parameter in the theoretical fitting of dimers. For dimers, each monomer  $J_0$  was averaged between the two participating dyes.

**Table S20.** Input fitting parameters used in calculations of two Cy5hex dimers.

| Parameter                      | Adjacent, BC | Adjacent, CD | Adjacent, AD |
|--------------------------------|--------------|--------------|--------------|
| $n_v$                          | 3            | 3            | 3            |
| $J_0^*$ (meV·nm <sup>3</sup> ) | 70.0         | 67.4         | 71.6         |
| $E_{of}$ (eV)                  | 0.020        | 0.015        | 0.014        |
| $E_v$ (eV)                     | 0.139        | 0.142        | 0.142        |
| $d$ (dimensionless units)      | 0.957        | 0.970        | 0.965        |
| $\Gamma$ (eV)                  | 0.046        | 0.049        | 0.052        |
| $l$ (nm)                       | 1.4          | 1.4          | 1.4          |
| $cdis$ (nm)                    | 0.34         | 0.34         | 0.34         |

\* $J_0$  was calculated from the fitting monomer absorption spectrum and used as an input parameter in the theoretical fitting of dimers. For dimers, each monomer  $J_0$  was averaged between the two participating dyes.

**Table S21.** The goodness of the fit parameters for absorbance and CD spectra for Cy5hex dimers (both for one and two dimers).

| <b>Construct</b>               | $r$   | $OI_{AB}$ | $OI_{CD}$ | $OI_{Tot}$ | $MSD_{abs}$ | $MSD_{cd}$ | $w_{abscd}rms$ |
|--------------------------------|-------|-----------|-----------|------------|-------------|------------|----------------|
| <b>Adjacent Dimer, AB</b>      | 1.017 | 0.981     | 0.973     | 0.977      | 0.344       | 0.679      | 1.023          |
| <b>Adjacent Dimer, BC</b>      | 1.033 | 0.973     | 0.824     | 0.899      | 0.807       | 2.858      | 0.807          |
| <b>Adjacent Dimer, CD</b>      | 0.984 | 0.956     | 0.801     | 0.878      | 1.124       | 3.833      | 4.957          |
| <b>Adjacent Dimer, AD</b>      | 1.021 | 0.960     | 0.841     | 0.901      | 0.802       | 3.635      | 4.437          |
| <b>Transverse Dimer, AC</b>    | 1.005 | 0.997     | 0.392     | 0.694      | 0.047       | 11.767     | 0.047          |
| <b>Transverse Dimer, BD</b>    | 0.987 | 0.977     | 0.887     | 0.932      | 0.430       | 2.683      | 3.113          |
| <b>Two Adjacent Dimers, BC</b> | 0.946 | 0.984     | 0.844     | 0.914      | 0.488       | 2.474      | 2.962          |
| <b>Two Adjacent Dimers, CD</b> | 0.981 | 0.995     | 0.780     | 0.888      | 0.138       | 3.972      | 4.110          |
| <b>Two Adjacent Dimers, AD</b> | 0.956 | 0.984     | 0.941     | 0.962      | 0.339       | 1.355      | 1.694          |

**Table S22.** Kühn-Renger-May model fitting outputs describing each dye in standard orientation and position in Cy5hex dimers for one dimer.

| Dye                         | $\theta_i$ (°) | $\varphi_i$ (°) | $x_i$ (nm) | $y_i$ (nm) | $z_i$ (nm) |
|-----------------------------|----------------|-----------------|------------|------------|------------|
| <b>Adjacent Dimer, AB</b>   |                |                 |            |            |            |
| Dye 1                       | 76.6           | 0.0             | 0.000      | 0.000      | -0.261     |
| Dye 2                       | 90.6           | 6.3             | 0.000      | 0.000      | 0.261      |
| <b>Adjacent Dimer, BC</b>   |                |                 |            |            |            |
| Dye 1                       | 46.7           | 0.0             | 0.000      | 0.000      | -0.576     |
| Dye 2                       | 112.2          | -3.4            | 0.000      | 0.000      | 0.576      |
| <b>Adjacent Dimer, CD</b>   |                |                 |            |            |            |
| Dye 1                       | 76.2           | 0.0             | 0.000      | 0.000      | -0.271     |
| Dye 2                       | 91.1           | 3.5             | 0.000      | 0.000      | 0.271      |
| <b>Adjacent Dimer, AD</b>   |                |                 |            |            |            |
| Dye 1                       | 78.1           | 0.0             | 0.000      | 0.000      | -0.248     |
| Dye 2                       | 89.8           | 4.9             | 0.000      | 0.000      | 0.248      |
| <b>Transverse Dimer, AC</b> |                |                 |            |            |            |
| Dye 1                       | 90.6           | 0.0             | 0.000      | 0.000      | -0.261     |
| Dye 2                       | 77.3           | -2.0            | 0.000      | 0.000      | 0.261      |
| <b>Transverse Dimer, BD</b> |                |                 |            |            |            |
| Dye 1                       | 92.7           | 0.0             | 0.000      | 0.000      | -0.194     |
| Dye 2                       | 89.1           | 3.2             | 0.000      | 0.000      | 0.194      |

**Table S23.** Kühn-Renger-May model fitting outputs describing each dye in standard orientation and position in Cy5hex dimers for two dimers.

| Dye                             | $\theta_i$ (°) | $\varphi_i$ (°) | $x_i$ (nm) | $y_i$ (nm) | $z_i$ (nm) |
|---------------------------------|----------------|-----------------|------------|------------|------------|
| <b>Two Adjacent Dimers, BC*</b> |                |                 |            |            |            |
| <b>Dye 1</b>                    | 130.5          | 0.0             | 0.000      | 0.000      | -0.516     |
| <b>Dye 2</b>                    | 56.3           | -36.6           | 0.000      | 0.000      | 0.516      |
| <b>Dye 3</b>                    | 121.2          | 0.0             | 0.000      | 0.000      | -0.577     |
| <b>Dye 4</b>                    | 44.2           | 26.2            | 0.000      | 0.000      | 0.577      |
| <b>Two Adjacent Dimers, CD*</b> |                |                 |            |            |            |
| <b>Dye 1</b>                    | 64.0           | 0.0             | 0.000      | 0.000      | -0.384     |
| <b>Dye 2</b>                    | 114.4          | 27.0            | 0.000      | 0.000      | 0.384      |
| <b>Dye 3</b>                    | 67.3           | 0.0             | 0.000      | 0.000      | -0.460     |
| <b>Dye 4</b>                    | 119.8          | -21.2           | 0.000      | 0.000      | 0.460      |
| <b>Two Adjacent Dimers, AD*</b> |                |                 |            |            |            |
| <b>Dye 1</b>                    | 78.1           | 0.0             | 0.000      | 0.000      | -0.301     |
| <b>Dye 2</b>                    | 86.4           | -18.0           | 0.000      | 0.000      | 0.301      |
| <b>Dye 3</b>                    | 73.1           | 0.0             | 0.000      | 0.000      | -0.247     |
| <b>Dye 4</b>                    | 97.9           | 24.5            | 0.000      | 0.000      | 0.247      |

\* Standard orientation and position of Dimer I (dyes 1 & 2) and Dimer II (dyes 3 & 4) separated by ~1,000 nm.



**Table S24.** Calculated  $J_{n,m}$  and geometric parameters of Cy5hex dimers (both for one and two dimers).

| <b>Dimer Aggregate</b>         | $J_{m,n}$ (meV) | $R$ , (Å) | $d_{min}$ (nm) | $\alpha$ (°) | $\theta_{1s}$ (°) | $\theta_{2s}$ (°) | $\theta_t$ (°) |
|--------------------------------|-----------------|-----------|----------------|--------------|-------------------|-------------------|----------------|
| <b>Adjacent, AB</b>            | 107.8           | 0.52      | 0.34           | 15.3         | 76.6              | 89.4              | 6.3            |
| <b>Adjacent, BC</b>            | 57.7            | 1.15      | 0.34           | 65.6         | 46.7              | 67.8              | -3.4           |
| <b>Adjacent, CD</b>            | 95.5            | 0.54      | 0.34           | 15.3         | 76.2              | 88.9              | 3.5            |
| <b>Adjacent, AD</b>            | 109.4           | 0.50      | 0.34           | 12.7         | 78.1              | 89.8              | 4.9            |
| <b>Transverse, AC</b>          | 104.3           | 0.52      | 0.34           | 13.4         | 89.4              | 77.3              | -2.0           |
| <b>Transverse, BD</b>          | 136.6           | 0.39      | 0.34           | 4.8          | 87.3              | 89.1              | 3.2            |
| <b>Two Adjacent Dimers, BC</b> | 59.5            | 1.03      | 0.39           | 81.5         | 49.5              | 56.3              | -36.6          |
|                                | 62.1            | 1.15      | 0.34           | 80.6         | 58.8              | 44.2              | 26.2           |
| <b>Two Adjacent Dimers CD</b>  | 77.8            | 0.77      | 0.34           | 56.8         | 64.0              | 65.6              | 27.0           |
|                                | 67.4            | 0.92      | 0.34           | 56.3         | 67.3              | 60.2              | -21.2          |
| <b>Two Adjacent Dimers AD</b>  | 67.8            | 0.60      | 0.54           | 19.6         | 78.1              | 86.4              | -18.0          |
|                                | 96.6            | 0.49      | 0.34           | 34.6         | 73.1              | 82.1              | 24.5           |

### Single Cy5tBu Dimer

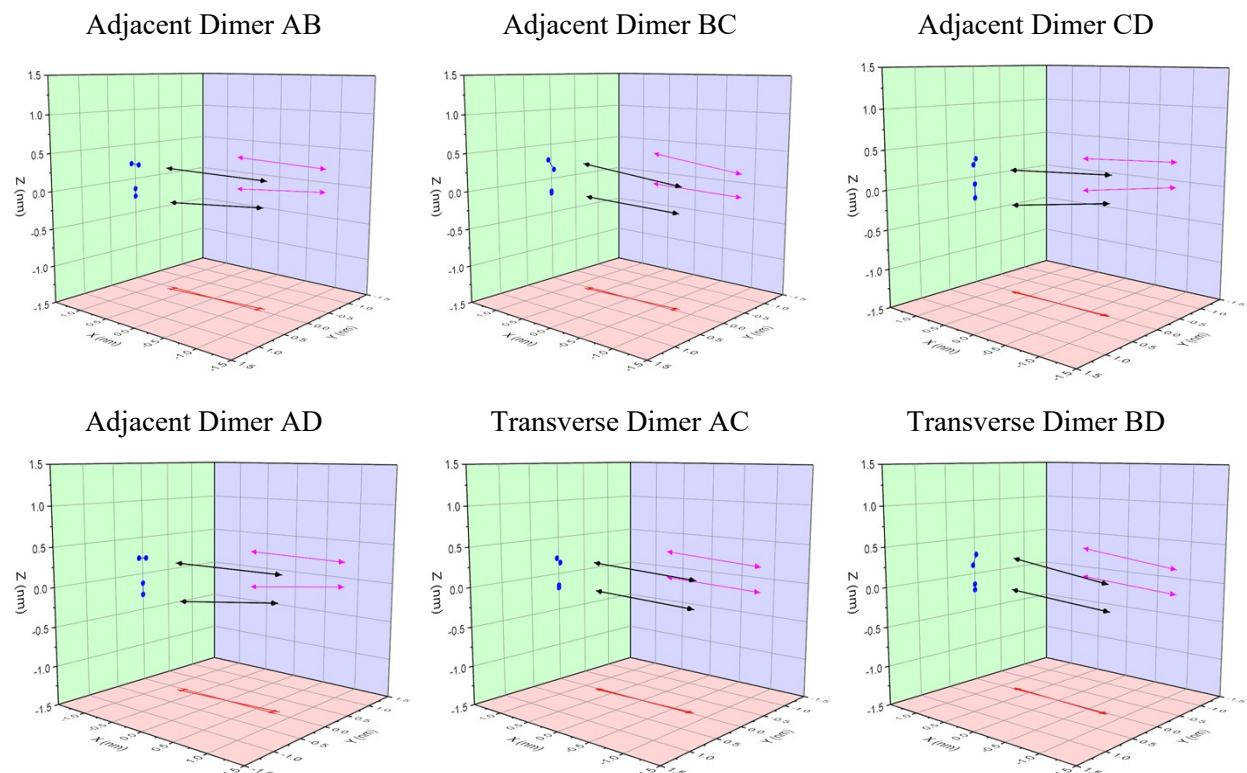

**Figure S23.** Three-dimensional vector plots of the KRM single dimer positions for Cy5tBu showing the different plane projections XY, XZ, and YZ.

## Single Cy5tBu Dimer: Absorbance and Circular Dichroism

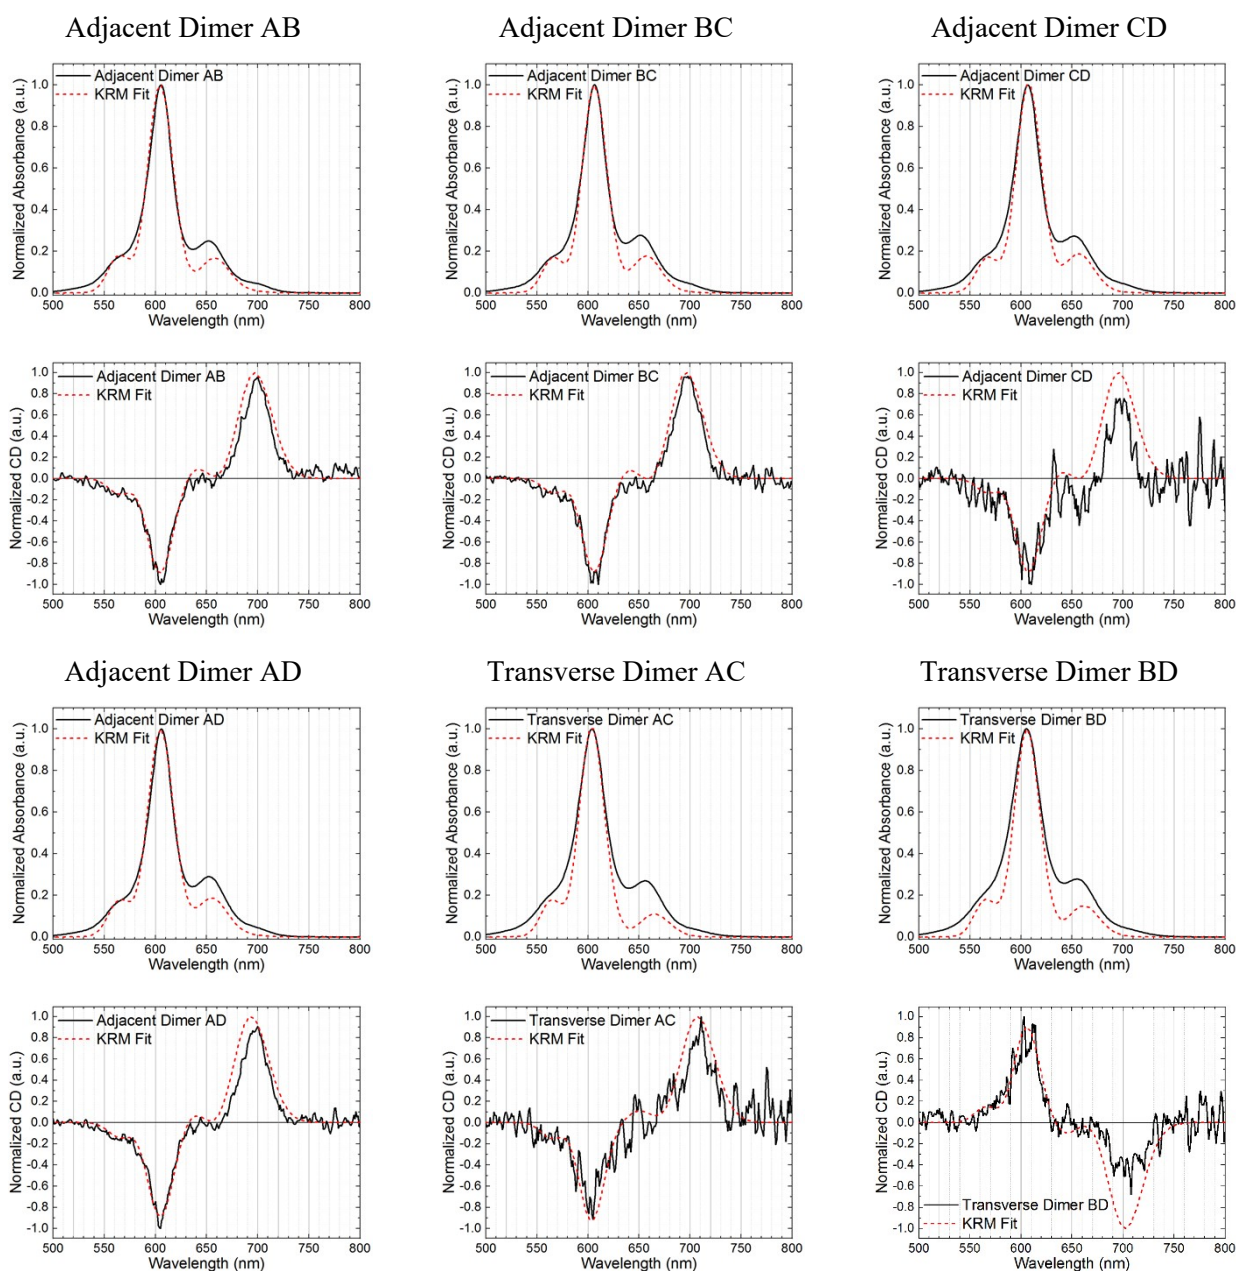

**Figure S24.** Normalized obtained steady-state absorption and circular dichroism spectra (solid line) of Cy5tBu covalently templated by DNA HJ with matching one dimer KRM Fit (dash-dot line). These spectra were recorded at 20 °C with the dye-DNA construct concentration at 2  $\mu$ M in 1 $\times$  TBE, 15 mM MgCl<sub>2</sub>.

**Table S25.** Various monomer parameters for Cy5tBu.

| Parameter                    | Monomer A | Monomer B | Monomer C | Monomer D |
|------------------------------|-----------|-----------|-----------|-----------|
| $E_v$ (eV)                   | 0.137     | 0.141     | 0.137     | 0.139     |
| $d$ (dimensionless units)    | 0.867     | 0.873     | 0.833     | 0.862     |
| $\Gamma$ (eV)                | 0.043     | 0.041     | 0.040     | 0.043     |
| $J_0$ (meV·nm <sup>3</sup> ) | 69.2      | 63.4      | 61.0      | 60.4      |
| $M$ (Debye)                  | 14.031    | 13.431    | 13.174    | 13.114    |

**Table S26.** Input fitting parameters used in calculations of Cy5tBu dimers.

| Parameter                      | Adjacent AB | Adjacent BC | Adjacent CD | Adjacent AD | Transverse AC | Transverse BD |
|--------------------------------|-------------|-------------|-------------|-------------|---------------|---------------|
| $n_v$                          | 3           | 3           | 3           | 3           | 3             | 3             |
| $J_0^*$ (meV·nm <sup>3</sup> ) | 66.3        | 62.2        | 60.7        | 64.8        | 65.1          | 61.9          |
| $E_{of}$ (eV)                  | 0.012       | 0.008       | -0.004      | 0.016       | -0.010        | 0.001         |
| $E_v$ (eV)                     | 0.139       | 0.139       | 0.138       | 0.138       | 0.137         | 0.140         |
| $d$ (dimensionless units)      | 0.870       | 0.853       | 0.848       | 0.865       | 0.850         | 0.868         |
| $\Gamma$ (eV)                  | 0.042       | 0.040       | 0.041       | 0.043       | 0.041         | 0.042         |
| $l$ (nm)                       | 1.4         | 1.4         | 1.4         | 1.4         | 1.4           | 1.4           |
| $cdis$ (nm)                    | 0.34        | 0.34        | 0.34        | 0.34        | 0.34          | 0.34          |

\* $J_0$  was calculated from the fitting monomer absorption spectrum and used as an input parameter in the theoretical fitting of dimers. For dimers, each monomer  $J_0$  was averaged between the two participating dyes.

**Table S27.** The goodness of the fit parameters for absorbance and CD spectra for Cy5tBu dimers.

| <b>Construct</b>                | <b><i>r</i></b> | <b><i>OI<sub>AB</sub></i></b> | <b><i>OI<sub>CD</sub></i></b> | <b><i>OI<sub>Tot</sub></i></b> | <b><i>MSD<sub>abs</sub></i></b> | <b><i>MSD<sub>cd</sub></i></b> | <b><i>w<sub>abscd</sub>r<sub>ms</sub></i></b> |
|---------------------------------|-----------------|-------------------------------|-------------------------------|--------------------------------|---------------------------------|--------------------------------|-----------------------------------------------|
| <b>Adjacent Dimer,<br/>AB</b>   | 1.013           | 0.991                         | 0.979                         | 0.985                          | 0.106                           | 0.446                          | 0.552                                         |
| <b>Adjacent Dimer,<br/>BC</b>   | 0.997           | 0.988                         | 0.980                         | 0.984                          | 0.163                           | 0.377                          | 0.539                                         |
| <b>Adjacent Dimer,<br/>CD</b>   | 1.010           | 0.988                         | 0.865                         | 0.926                          | 0.167                           | 2.439                          | 2.605                                         |
| <b>Adjacent Dimer,<br/>AD</b>   | 0.996           | 0.991                         | 0.974                         | 0.982                          | 0.121                           | 0.620                          | 0.741                                         |
| <b>Transverse Dimer,<br/>AC</b> | 1.002           | 0.971                         | 0.946                         | 0.959                          | 0.451                           | 1.245                          | 1.696                                         |
| <b>Transverse Dimer,<br/>BD</b> | 0.998           | 0.977                         | 0.900                         | 0.938                          | 0.437                           | 2.172                          | 2.609                                         |

**Table S28.** Kühn-Renger-May model fitting outputs describing each dye orientation and position in Cy5tBu dimers.

| Dye                         | $\theta_i$ (°) | $\varphi_i$ (°) | $x_i$ (nm) | $y_i$ (nm) | $z_i$ (nm) |
|-----------------------------|----------------|-----------------|------------|------------|------------|
| <b>Adjacent Dimer, AB</b>   |                |                 |            |            |            |
| Dye 1                       | 94.5           | 0.0             | 0.000      | 0.000      | -0.207     |
| Dye 2                       | 88.7           | 5.9             | 0.000      | 0.000      | 0.207      |
| <b>Adjacent Dimer, BC</b>   |                |                 |            |            |            |
| Dye 1                       | 88.8           | 0.0             | 0.000      | 0.000      | -0.202     |
| Dye 2                       | 83.9           | 4.5             | 0.000      | 0.000      | 0.202      |
| <b>Adjacent Dimer, CD</b>   |                |                 |            |            |            |
| Dye 1                       | 98.0           | 0.0             | 0.000      | 0.000      | -0.204     |
| Dye 2                       | 93.2           | 1.8             | 0.000      | 0.000      | 0.204      |
| <b>Adjacent Dimer, AD</b>   |                |                 |            |            |            |
| Dye 1                       | 83.5           | 0.0             | 0.000      | 0.000      | -0.214     |
| Dye 2                       | 90.4           | 5.4             | 0.000      | 0.000      | 0.214      |
| <b>Transverse Dimer, AC</b> |                |                 |            |            |            |
| Dye 1                       | 88.5           | 0.0             | 0.000      | 0.000      | -0.181     |
| Dye 2                       | 87.3           | 2.5             | 0.000      | 0.000      | 0.181      |
| <b>Transverse Dimer, BD</b> |                |                 |            |            |            |
| Dye 1                       | 86.8           | 0.0             | 0.000      | 0.000      | -0.188     |
| Dye 2                       | 84.2           | -2.5            | 0.000      | 0.000      | 0.188      |

**Table S29.** Calculated  $J_{m,n}$  and geometric parameters of Cy5tBu dimers.

| <b>Dimer Aggregate</b> | $J_{m,n}$ (meV) | $R$ , (Å) | $d_{min}$ (nm) | $\alpha$ (°) | $\theta_{1s}$ (°) | $\theta_{2s}$ (°) | $\theta_t$ (°) |
|------------------------|-----------------|-----------|----------------|--------------|-------------------|-------------------|----------------|
| <b>Adjacent, AB</b>    | 119.1           | 0.41      | 0.34           | 8.3          | 85.5              | 88.7              | 5.9            |
| <b>Adjacent, BC</b>    | 115.4           | 0.40      | 0.34           | 6.7          | 88.8              | 83.9              | 4.5            |
| <b>Adjacent, CD</b>    | 112.4           | 0.41      | 0.34           | 5.1          | 82.0              | 86.8              | 1.8            |
| <b>Adjacent, AD</b>    | 113.2           | 0.43      | 0.34           | 8.8          | 83.5              | 89.6              | 5.4            |
| <b>Transverse, AC</b>  | 137.5           | 0.36      | 0.35           | 2.8          | 88.5              | 87.3              | 2.5            |
| <b>Transverse, BD</b>  | 124.7           | 0.38      | 0.34           | 3.6          | 86.8              | 84.2              | -2.5           |

### Single Cy5H Dimer

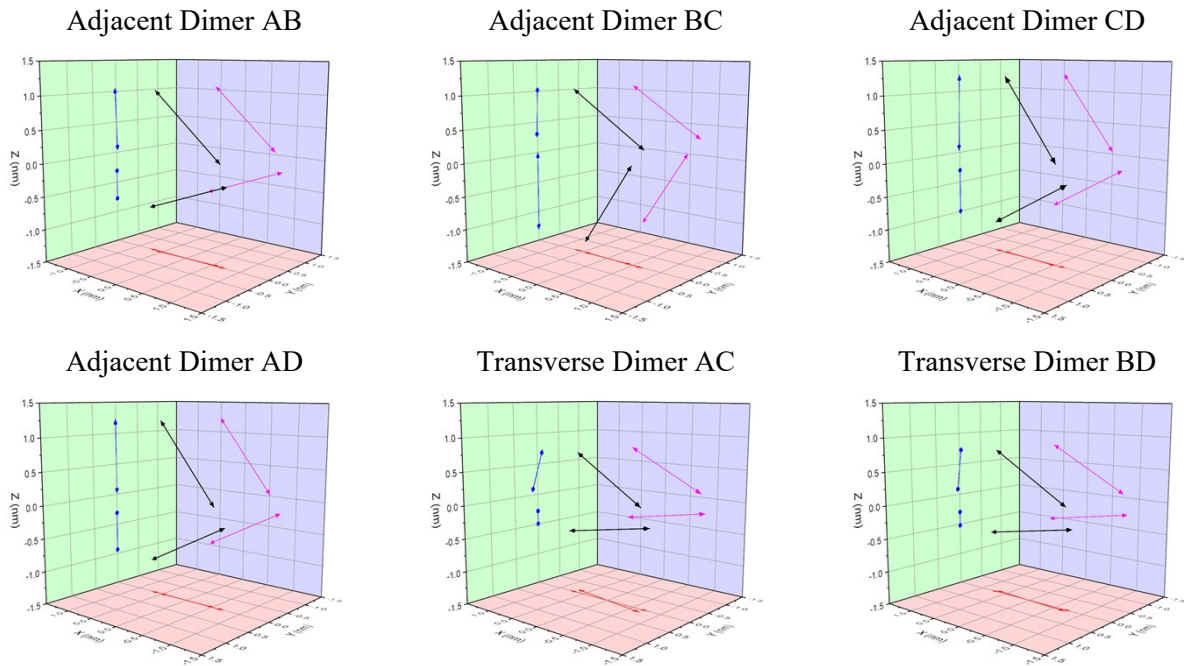

**Figure S25.** Three-dimensional vector plots of the KRM single dimer positions for Cy5H showing the different plane projections XY, XZ, and YZ.



## Single Cy5H Dimer: Absorbance and Circular Dichroism

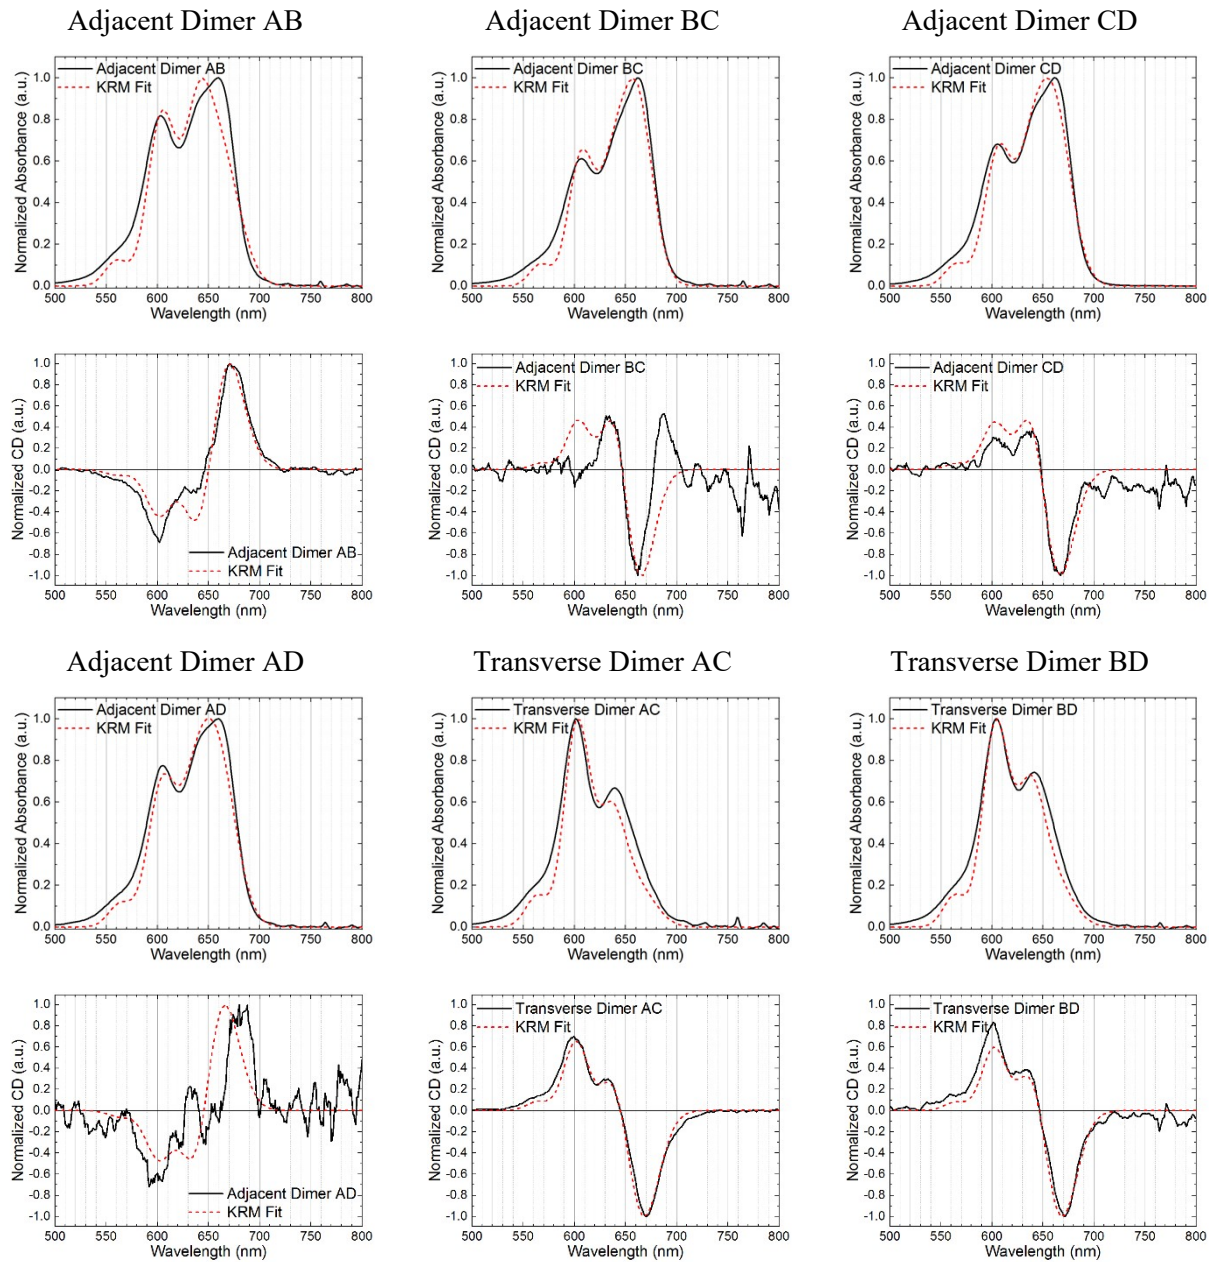

**Figure S26.** Normalized obtained steady-state absorption and circular dichroism spectra (solid line) of Cy5H covalently templated by DNA HJ with matching one dimer KRM Fit (dash-dot line). These spectra were recorded at 20 °C with the dye-DNA construct concentration at 2  $\mu$ M in  $1\times$  TBE, 15 mM  $MgCl_2$ .

**Table S30.** Various monomer parameters for Cy5H.

| Parameter                    | Monomer A | Monomer B | Monomer C | Monomer D |
|------------------------------|-----------|-----------|-----------|-----------|
| $E_v$ (eV)                   | 0.138     | 0.136     | 0.139     | 0.145     |
| $d$ (dimensionless units)    | 0.810     | 0.810     | 0.800     | 0.810     |
| $\Gamma$ (eV)                | 0.044     | 0.039     | 0.039     | 0.044     |
| $J_0$ (meV·nm <sup>3</sup> ) | 13.831    | 13.736    | 13.854    | 13.388    |
| $M$ (Debye)                  | 67.2      | 66.3      | 67.5      | 63.0      |

**Table S31.** Input fitting parameters used in calculations of Cy5H dimers.

| Parameter                      | Adjacent , AB | Adjacent , BC | Adjacent , CD | Adjacent , AD | Transverse , AC | Transverse , BD |
|--------------------------------|---------------|---------------|---------------|---------------|-----------------|-----------------|
| $n_v$                          | 3             | 3             | 3             | 3             | 3               | 3               |
| $J_0^*$ (meV·nm <sup>3</sup> ) | 67.2          | 66.9          | 65.2          | 65.1          | 67.3            | 64.6            |
| $E_{of}$ (eV)                  | 0.005         | 0.017         | 0.008         | 0.015         | 0.021           | 0.019           |
| $E_v$ (eV)                     | 0.155         | 0.137         | 0.142         | 0.1416        | 0.1383          | 0.141           |
| $d$ (dimensionless units)      | 0.780         | 0.805         | 0.805         | 0.810         | 0.805           | 0.810           |
| $\Gamma$ (eV)                  | 0.043         | 0.039         | 0.042         | 0.044         | 0.0415          | 0.042           |
| $l$ (nm)                       | 1.4           | 1.4           | 1.4           | 1.4           | 1.4             | 1.4             |
| $cdis$ (nm)                    | 0.34          | 0.34          | 0.34          | 0.34          | 0.34            | 0.34            |

\* $J_0$  was calculated from the fitting monomer absorption spectrum and used as an input parameter in the theoretical fitting of dimers. For dimers, each monomer  $J_0$  was averaged between the two participating dyes.

**Table S32.** The goodness of the fit parameters for absorbance and CD spectra for Cy5H dimers.

| <b>Construct</b>                | <b><i>r</i></b> | <b><i>OI<sub>AB</sub></i></b> | <b><i>OI<sub>CD</sub></i></b> | <b><i>OI<sub>Tot</sub></i></b> | <b><i>MSD<sub>abs</sub></i></b> | <b><i>MSD<sub>cd</sub></i></b> | <b><i>w<sub>abscd</sub>rms</i></b> |
|---------------------------------|-----------------|-------------------------------|-------------------------------|--------------------------------|---------------------------------|--------------------------------|------------------------------------|
| <b>Adjacent Dimer,<br/>AB</b>   | 0.951           | 0.986                         | 0.949                         | 0.968                          | 0.415                           | 0.735                          | 1.149                              |
| <b>Adjacent Dimer,<br/>BC</b>   | 0.973           | 0.992                         | 0.626                         | 0.809                          | 0.179                           | 4.288                          | 0.179                              |
| <b>Adjacent Dimer,<br/>CD</b>   | 0.986           | 0.992                         | 0.926                         | 0.959                          | 0.203                           | 0.951                          | 1.154                              |
| <b>Adjacent Dimer,<br/>AD</b>   | 1.048           | 0.994                         | 0.627                         | 0.810                          | 0.197                           | 5.393                          | 0.197                              |
| <b>Transverse Dimer,<br/>AC</b> | 1.022           | 0.986                         | 0.988                         | 0.987                          | 0.333                           | 0.192                          | 0.525                              |
| <b>Transverse Dimer,<br/>BD</b> | 0.994           | 0.992                         | 0.974                         | 0.983                          | 0.214                           | 0.502                          | 0.716                              |

**Table S33.** Kühn-Renger-May model fitting outputs describing each dye orientation and position in Cy5H dimers.

| Dye                         | $\theta_i$ (°) | $\varphi_i$ (°) | $x_i$ (nm) | $y_i$ (nm) | $z_i$ (nm) |
|-----------------------------|----------------|-----------------|------------|------------|------------|
| <b>Adjacent Dimer, AB</b>   |                |                 |            |            |            |
| Dye 1                       | 70.5           | 0.0             | 0.000      | 0.000      | -0.544     |
| Dye 2                       | 129.6          | 1.8             | 0.000      | 0.000      | 0.544      |
| <b>Adjacent Dimer, BC</b>   |                |                 |            |            |            |
| Dye 1                       | 34.4           | 0.0             | 0.000      | 0.000      | -0.659     |
| Dye 2                       | 120.4          | -1.2            | 0.000      | 0.000      | 0.659      |
| <b>Adjacent Dimer, CD</b>   |                |                 |            |            |            |
| Dye 1                       | 119.5          | 0.0             | 0.000      | 0.000      | -0.648     |
| Dye 2                       | 39.2           | -1.7            | 0.000      | 0.000      | 0.648      |
| <b>Adjacent Dimer, AD</b>   |                |                 |            |            |            |
| Dye 1                       | 116.3          | 0.0             | 0.000      | 0.000      | -0.623     |
| Dye 2                       | 40.1           | 0.6             | 0.000      | 0.000      | 0.623      |
| <b>Transverse Dimer, AC</b> |                |                 |            |            |            |
| Dye 1                       | 99.1           | 0.0             | 0.000      | 0.000      | -0.388     |
| Dye 2                       | 64.9           | -9.6            | 0.000      | 0.000      | 0.388      |
| <b>Transverse Dimer, BD</b> |                |                 |            |            |            |
| Dye 1                       | 99.2           | 0.0             | 0.000      | 0.000      | -0.409     |
| Dye 2                       | 63.1           | -3.9            | 0.000      | 0.000      | 0.409      |

**Table S34.** Calculated  $J_{m,n}$  and geometric parameters of Cy5H dimers.

| <b>Dimer Aggregate</b> | $J_{m,n}$ (meV) | $R$ , (Å) | $d_{min}$ (nm) | $\alpha$ (°) | $\theta_{1s}$ (°) | $\theta_{2s}$ (°) | $\theta_t$ (°) |
|------------------------|-----------------|-----------|----------------|--------------|-------------------|-------------------|----------------|
| <b>Adjacent, AB</b>    | 57.5            | 1.09      | 0.34           | 59.1         | 70.5              | 50.4              | 1.8            |
| <b>Adjacent, BC</b>    | 51.1            | 1.32      | 0.34           | 86.0         | 34.4              | 59.6              | -1.2           |
| <b>Adjacent, CD</b>    | 50.3            | 1.30      | 0.34           | 80.3         | 60.5              | 39.2              | -1.7           |
| <b>Adjacent, AD</b>    | 51.2            | 1.25      | 0.34           | 76.3         | 63.7              | 40.1              | 0.6            |
| <b>Transverse, AC</b>  | 72.5            | 0.78      | 0.34           | 35.5         | 80.9              | 64.9              | -9.6           |
| <b>Transverse, BD</b>  | 66.9            | 0.82      | 0.34           | 36.3         | 80.8              | 63.1              | -3.9           |
